# Supplementary material for: Efficient total synthesis of (−)-stemoamide
Source: Royal Society of Chemistry journal article supplement (doi:10.1039/c0ob00850h), 2010-11-19
Supplement: c0ob00850h.pdf [file c0ob00850h.pdf]

# Efficient Total Synthesis of (-)-Stemoamide

Toshio Honda,\* Tomoha Matsukawa, and Kazunori Takahashi

Faculty of Pharmaceutical Sciences, Hoshi University, Ebara 2-4-41, Shinagawa-ku,  
Tokyo 142-8501, Japan

honda@hoshi.ac.jp

## ELECTRONIC SUPPLEMENTARY INFORMATION (ESI)

|                                                                                                                                                                              |     |
|------------------------------------------------------------------------------------------------------------------------------------------------------------------------------|-----|
| 1) General Experimental Procedures                                                                                                                                           | S-2 |
| 2) Experimental Procedures                                                                                                                                                   |     |
| (5 <i>S</i> )-({ <i>tert</i> -Butyl(dimethyl)silyl}oxy)methyl-1-[4-(tetrahydro-2 <i>H</i> -pyran-2-yloxy)butyl]pyrrolidin-2-one ( <b>6</b> )                                 | S-3 |
| (5 <i>S</i> )-(Hydroxymethyl)-1-[4-(tetrahydro-2 <i>H</i> -pyran-2-yloxy)butyl]-pyrrolidin-2-one ( <b>7</b> )                                                                | S-3 |
| (2 <i>S</i> )-5-Oxo-1-[4-(tetrahydro-2 <i>H</i> -pyran-2-yloxy)butyl]pyrrolidine-2-carbaldehyde ( <b>8</b> )                                                                 | S-3 |
| Methyl (2 <i>E</i> )-3-{(2 <i>S</i> )-5-oxo-1-[4-(tetrahydro-2 <i>H</i> -pyran-2-yloxy)butyl]pyrrolidin-2-yl}acrylate ( <b>9</b> )                                           | S-3 |
| Methyl (2 <i>E</i> )-3-[(2 <i>S</i> )-1-[4-(hydroxybutyl)-5-oxopyrrolidin-2-yl]acrylate ( <b>10</b> )                                                                        | S-4 |
| Methyl (2 <i>E</i> )-3-{(2 <i>S</i> )-5-oxo-1-[4-oxobutyl]pyrrolidin-2-yl}acrylate ( <b>11</b> )                                                                             | S-4 |
| SmI <sub>2</sub> -promoted cyclization of <b>11</b> to <b>12</b> and <b>13</b> in the absence of HMPA                                                                        | S-5 |
| (3 <i>aR</i> ,10 <i>aS</i> ,10 <i>bS</i> )-Octahydro-2 <i>H</i> -furo[3,2- <i>c</i> ]pyrrolo[1,2- <i>a</i> ]azepine-2,8(1 <i>H</i> )-dione ( <b>12</b> )                     | S-5 |
| (3 <i>aS</i> ,10 <i>aS</i> ,10 <i>bS</i> )-Octahydro-2 <i>H</i> -furo[3,2- <i>c</i> ]pyrrolo[1,2- <i>a</i> ]azepine-2,8(1 <i>H</i> )-dione ( <b>13</b> )                     | S-5 |
| (3 <i>aR</i> ,10 <i>aS</i> )-3 <i>a</i> ,4,5,6,10,10 <i>a</i> -Hexahydro-2 <i>H</i> -furo[3,2- <i>c</i> ]pyrrolo[1,2- <i>a</i> ]azepine-2,8(9 <i>H</i> )-dione ( <b>15</b> ) | S-5 |
| SmI <sub>2</sub> -promoted cyclization of <b>11</b> to <b>16</b> in the presence of HMPA                                                                                     | S-6 |
| (3 <i>aS</i> ,10 <i>aS</i> )-3 <i>a</i> ,4,5,6,10,10 <i>a</i> -Hexahydro-2 <i>H</i> -furo[3,2- <i>c</i> ]pyrrolo[1,2- <i>a</i> ]azepine-                                     |     |

|                                                                                                                                                                                             |      |
|---------------------------------------------------------------------------------------------------------------------------------------------------------------------------------------------|------|
| 2,8(9 <i>H</i> )-dione ( <b>16</b> )                                                                                                                                                        | S-6  |
| SmI <sub>2</sub> -promoted cyclization of <b>11</b> to <b>16</b> in the presence of HMPA                                                                                                    | S-6  |
| SmI <sub>2</sub> -promoted cyclization of <b>18</b> to <b>12</b> and <b>13</b> in the absence of HMPA                                                                                       | S-6  |
| SmI <sub>2</sub> -promoted cyclization of <b>18</b> to <b>16</b> in the presence of HMPA                                                                                                    | S-7  |
| (1 <i>S</i> ,3 <i>aR</i> ,10 <i>aS</i> ,10 <i>bR</i> )-1-Methyloctahydro-2 <i>H</i> -furo[3,2- <i>c</i> ]pyrrolo[1,2- <i>a</i> ]azepine-2,8(1 <i>H</i> )-dione; (-)-Stemoamide ( <b>1</b> ) | S-7  |
| 3) NMR spectra                                                                                                                                                                              |      |
| <sup>1</sup> H NMR Spectrum of <b>6</b>                                                                                                                                                     | S-8  |
| <sup>13</sup> C NMR Spectrum of <b>6</b>                                                                                                                                                    | S-9  |
| <sup>1</sup> H NMR Spectrum of <b>7</b>                                                                                                                                                     | S-10 |
| <sup>13</sup> C NMR Spectrum of <b>7</b>                                                                                                                                                    | S-11 |
| <sup>1</sup> H NMR Spectrum of <b>9</b>                                                                                                                                                     | S-12 |
| <sup>13</sup> C NMR Spectrum of <b>9</b>                                                                                                                                                    | S-13 |
| <sup>1</sup> H NMR Spectrum of <b>10</b>                                                                                                                                                    | S-14 |
| <sup>13</sup> C NMR Spectrum of <b>10</b>                                                                                                                                                   | S-15 |
| <sup>1</sup> H NMR Spectrum of <b>11</b>                                                                                                                                                    | S-16 |
| <sup>13</sup> C NMR Spectrum of <b>11</b>                                                                                                                                                   | S-17 |
| <sup>1</sup> H NMR Spectrum of <b>15</b>                                                                                                                                                    | S-18 |
| <sup>13</sup> C NMR Spectrum of <b>15</b>                                                                                                                                                   | S-19 |
| <sup>1</sup> H NMR Spectrum of <b>16</b>                                                                                                                                                    | S-20 |
| <sup>13</sup> C NMR Spectrum of <b>16</b>                                                                                                                                                   | S-21 |
| <sup>1</sup> H NMR Spectrum of <b>1</b>                                                                                                                                                     | S-22 |

**General Experimental Procedures.** Melting points were measured with a melting point apparatus and are uncorrected. IR spectra were recorded as thin films on sodium chloride plates. Otherwise noted, <sup>1</sup>H and <sup>13</sup>C NMR spectra were obtained for solutions in CDCl<sub>3</sub>, and chemical shifts are reported on the δ scale using TMS as an internal standard of δ 0.00 for <sup>1</sup>H-NMR spectra, and CDCl<sub>3</sub> as an internal standard or δ 77.00 for <sup>13</sup>C NMR spectra, respectively (<sup>1</sup>H-NMR: 400 MHz, <sup>13</sup>C NMR: 100 MHz). Reagents were purchased from commercial sources.

**(5S)-({*tert*-Butyl(dimethyl)silyloxy}methyl)-1-[4-(tetrahydro-2*H*-pyran-2-yloxy)-butyl]pyrrolidin-2-one (6).** To a stirred solution of the amide (5) (2.00 g, 8.73 mmol), 2-(4-bromobutoxy)tetrahydro-2*H*-pyran (4.10 g, 17.37 mmol), and tetrabutylammonium iodide (323 mg, 0.84 mmol) in DMF (88 mL) was added dropwise NaHMDS (1.9M in THF solution, 6.9 mL, 13.1 mmol) at -15 °C. The resulting mixture was stirred at the same temperature for 10 min, and at ambient temperature for 3 h. The mixture was treated with saturated aqueous NH<sub>4</sub>Cl solution, diluted with H<sub>2</sub>O, and extracted three times with CHCl<sub>3</sub>. The combined organic extracts were washed twice with H<sub>2</sub>O and brine, dried over Na<sub>2</sub>SO<sub>4</sub> and concentrated under reduced pressure. The residue was purified by column chromatography on silica gel. Elution with hexane-EtOAc (3:7, v/v) gave **6** (2.96 g, 88%) as a colorless oil.  $[\alpha]_D^{20} +5.76$  (c 1.0 CHCl<sub>3</sub>); IR  $\nu_{\text{max}}$ : 3473, 2938, 2857, 1687, 1460 cm<sup>-1</sup>; <sup>1</sup>H NMR  $\delta$ : 4.50 (t, *J* = 4.2 Hz, 1H), 3.85-3.76 (m, 1H), 3.75-3.50 (m, 5H), 3.48-3.40 (m, 1H), 3.38-3.32 (m, 1H), 3.10-2.92 (m, 1H), 2.44-2.34 (m, 1H), 2.28-2.20 (m, 1H), 2.08-1.96 (m, 1H), 1.84-1.73 (m, 2H), 1.58-1.42 (m, 9H), 0.90 (s, 9H), 0.05 (s, 6H); <sup>13</sup>C NMR  $\delta$ : 175.2, 98.8, 67.0, 63.8, 62.3, 58.8, 40.5, 30.6, 30.5, 27.0, 25.6, 25.3, 24.2, 21.4, 19.5, 18.0, -5.7; HRMS Calcd for C<sub>20</sub>H<sub>40</sub>NO<sub>4</sub>Si [M+H]<sup>+</sup> 386.2726. Found 386.2721.

**(5S)-(Hydroxymethyl)-1-[4-(tetrahydro-2*H*-pyran-2-yloxy)butyl]pyrrolidin-2-one (7).** To a stirred solution of **6** (2.00 g, 5.19 mmol) in MeOH (26 mL) was added NH<sub>4</sub>F (962 mg, 25.98 mmol) at room temperature and the resulting mixture was heated at reflux for 10 h. After concentration of the mixture in vacuo, a residue was taken up into 5% methanol in CHCl<sub>3</sub> and the whole solution was filtrated to remove the insoluble materials. The filtrate was concentrated to leave a residue, which was purification by column chromatography on silica gel. Elution with MeOH-EtOAc (5:95, v/v) furnished **7** as a colorless oil (1.34 g, 95%).  $[\alpha]_D^{20} +6.4$  (c 1.0); IR  $\nu_{\text{max}}$ : 3409, 2938, 1660, 1464 cm<sup>-1</sup>; <sup>1</sup>H NMR  $\delta$ : 4.50 (t, *J* = 4.2 Hz, 1H), 3.85-3.50 (m, 6H), 3.52-3.44 (m, 1H), 3.43-3.36 (m, 1H), 3.11-3.02 (m, 1H), 2.51-2.40 (m, 1H), 2.34-2.25 (m, 1H), 2.14-2.04 (m, 1H), 2.00-1.90 (m, 1H), 1.80-1.74 (m, 1H), 1.74-1.46 (m, 9H); <sup>13</sup>C NMR  $\delta$ : 175.8, 99.0, 67.0, 62.8, 62.6, 59.1, 40.5, 30.7, 30.5, 27.0, 25.4, 24.3, 21.2, 19.8; HRMS Calcd for C<sub>14</sub>H<sub>26</sub>NO<sub>4</sub> [M+H]<sup>+</sup> 272.1862. Found 272.1846.

**Methyl (2*E*)-3-{{(2*S*)-5-oxo-1-[4-(tetrahydro-2*H*-pyran-2-yloxy)butyl]pyrrolidin-2-yl}acrylate (9).** To a stirred solution of oxalyl chloride (1.52 mL, 17.96 mmol) in CH<sub>2</sub>Cl<sub>2</sub> (22 mL) was added a solution of DMSO (1.9 mL, 26.75 mmol) in CH<sub>2</sub>Cl<sub>2</sub> (4.5 mL) at -78 °C under argon, and the resulting solution was stirred at the same

temperature for 10 min. A solution of **7** (2.40 g, 8.86 mmol) in CH<sub>2</sub>Cl<sub>2</sub> (15 mL) was added to the solution, and the whole was stirred at the same temperature for further 1 h. The mixture was treated with triethylamine (8.7 mL, 62.13 mmol), and warmed to room temperature over the period of 20 min. The solution was treated with H<sub>2</sub>O and extracted with CHCl<sub>3</sub>. The organic layer was washed with brine and dried over Na<sub>2</sub>SO<sub>4</sub>. Removal of the solvent under reduced pressure afforded the aldehyde **8**, which without further purification, was used directly in the next step.

To a stirred solution of the crude aldehyde (**8**) (2.36 g, 8.77 mmol) in acetonitrile (43 mL) was added methyl (triphenylphosphoranylidene)acetate (3.82 g, 11.44 mmol), and the resulting mixture was stirred at room temperature for 12 h. Removal of the solvent under reduced pressure gave a residue, which was purified by column chromatography on silica gel. Elution with hexane-EtOAc (1:9, v/v) gave **9** (2.36 g, 82%) as a colorless oil.  $[\alpha]_D^{20} +5.3$  (c 0.9); IR  $\nu_{\text{max}}$ : 2947, 1725, 1687, 1437 cm<sup>-1</sup>; <sup>1</sup>H NMR  $\delta$ : 6.75 (dd,  $J = 8.1, 15.6$  Hz, 1H), 5.95 (d,  $J = 15.6$  Hz, 1H), 4.50 (t,  $J = 4.2$  Hz, 1H), 4.27-4.20 (m, 1H), 3.87-3.80 (m, 1H), 3.77-3.70 (m, 4H), 3.68-3.60 (m, 1H), 3.52-3.46 (m, 1H), 3.41-3.35 (m, 1H), 2.90-2.82 (m, 1H), 2.50-2.20 (m, 3H), 1.86-1.75 (m, 2H), 1.74-1.46 (m, 9H); <sup>13</sup>C NMR  $\delta$ : 174.6, 166.0, 146.6, 122.7, 98.9, 66.9, 62.4, 58.7, 51.8, 40.8, 30.7, 29.6, 27.0, 25.4, 24.9, 24.2, 19.7; HRMS Calcd for C<sub>17</sub>H<sub>28</sub>NO<sub>5</sub> [M+H]<sup>+</sup> 326.1967. Found 326.1945.

**Methyl (2E)-3-[(2S)-1-[4-(hydroxybutyl)-5-oxopyrrolidin-2-yl]acrylate (10).** To a stirred solution of **9** (2.84 g, 8.74 mmol) in MeOH (87 mL) was added *p*-TSA (166 mg, 0.87 mmol) at room temperature, and the resulting mixture was stirred at the same temperature for further 12 h. The reaction was quenched by addition of saturated aqueous NaHCO<sub>3</sub> solution and the aqueous layer was extracted with CHCl<sub>3</sub>. The extract was washed with brine and dried over Na<sub>2</sub>SO<sub>4</sub>. Removal of the solvent under reduced pressure afforded the alcohol (**10**) (1.94 g, 92%) as a colorless oil.  $[\alpha]_D^{20} +7.5$  (c 1.0); IR  $\nu_{\text{max}}$ : 3401, 2946, 1720, 1666, 1436 cm<sup>-1</sup>; <sup>1</sup>H NMR  $\delta$ : 6.75 (dd,  $J = 8.3, 15.7$  Hz, 1H), 5.95 (d,  $J = 15.7$  Hz, 1H), 4.25 (dt,  $J = 4.8, 8.0$  Hz, 1H), 3.75 (s, 3H), 3.65-3.55 (m, 3H), 2.94-2.83 (m, 1H), 2.50-2.25 (m, 4H), 1.86-1.77 (m, 1H), 1.60–1.45 (m, 4H); <sup>13</sup>C NMR  $\delta$ : 175.0, 165.9, 146.4, 122.8, 62.1, 58.9, 51.8, 40.7, 29.6, 29.4, 24.8, 23.8; HRMS Calcd for C<sub>12</sub>H<sub>20</sub>NO<sub>4</sub> [M+H]<sup>+</sup> 242.1392. Found 242.1369.

**Methyl (2E)-3-[(2S)-5-oxo-1-[4-oxobutyl]pyrrolidin-2-yl]acrylate (11).** To a solution of oxalyl chloride (0.15 mL, 1.77 mmol) in CH<sub>2</sub>Cl<sub>2</sub> (2 mL) was added a solution of DMSO (0.18 mL, 2.49 mmol) in CH<sub>2</sub>Cl<sub>2</sub> (0.4 mL) at -78 °C under argon, and the

resulting solution was stirred at the same temperature for 10 min. A solution of alcohol **10** (200 mg, 0.83 mmol) in CH<sub>2</sub>Cl<sub>2</sub> (2 mL) was added to the solution, and the whole was stirred at the same temperature for 1 h. After the mixture was treated with triethylamine (0.82 mL, 5.88 mmol), the whole was warmed up to room temperature over the period of 20 min. The solution was treated with H<sub>2</sub>O, and extracted with CHCl<sub>3</sub>. The organic layer was washed with brine, dried over Na<sub>2</sub>SO<sub>4</sub>, and concentrated under reduced pressure to leave a residue, which was subjected to column chromatography on silica gel. Elution with MeOH-CHCl<sub>3</sub> (2:98, v/v) afforded the aldehyde (**11**) (168 mg, 85%) as a colorless oil. [ $\alpha$ ]<sub>D</sub><sup>20</sup> +9.5 (c 1.0); IR  $\nu_{\text{max}}$ : 2915, 1720, 1670, 1435 cm<sup>-1</sup>; <sup>1</sup>H NMR  $\delta$ : 9.75 (s, 1H), 6.75 (dd,  $J$  = 8.4, 15.5 Hz, 1H), 5.95 (d,  $J$  = 15.5 Hz, 1H), 4.25 (dt,  $J$  = 4.7, 8.1 Hz, 1H), 3.75 (s, 3H), 3.60-3.50 (m, 1H), 2.92-2.84 (m, 1H), 2.52-2.20 (m, 5H), 1.85-1.74 (m, 3H); <sup>13</sup>C NMR  $\delta$ : 201.1, 175.0, 165.9, 146.1, 123.1, 58.8, 51.8, 41.1, 40.2, 29.4, 24.8, 19.7; HRMS Calcd for C<sub>12</sub>H<sub>17</sub>NO<sub>4</sub> [M]<sup>+</sup> 239.1157. Found 239.1185.

**SmI<sub>2</sub>-promoted cyclization of 11 to 12 and 13 in the absence of HMPA.** To a stirred solution of the aldehyde (**11**) (100 mg, 0.42 mmol) in THF (21 mL) in the presence of MeOH (85  $\mu$ L, 2.1 mmol) was added SmI<sub>2</sub> (0.2 M in THF solution, 10.5 mL, 2.1 mmol) at 0 °C under argon. After being stirred for 3 h, the resulting mixture was treated saturated aqueous NH<sub>4</sub>Cl solution and extracted with CHCl<sub>3</sub>. The organic layer was washed with brine and dried over Na<sub>2</sub>SO<sub>4</sub>. Evaporation of the solvent gave a mixture of **12** and **13** in 60% yield, in a ratio of *ca.* 0.9 : 1, based on the analysis of its <sup>1</sup>H NMR spectrum. Spectroscopic data of **12**<sup>1</sup> and **13**<sup>2,3</sup> were similar to those reported in the literature.

**(3a*S*,10a*S*)-3a,4,5,6,10,10a-Hexahydro-2*H*-furo[3,2-*c*]pyrrolo[1,2-*a*]azepine-2,8(9*H*)-dione (**15**).** To a stirred solution of **12** (293 mg, 1.40 mmol) in THF (37 mL) was added LiHMDS (1.6M in THF solution, 3.5 mL, 5.60 mmol) at -78 °C. After being stirred at the same temperature for 30 min, phenylselenenyl bromide (828 mg, 3.51 mmol) was added, and the resulting mixture was stirred for 1 h. After the reaction mixture was quenched by addition of 1 M hydrochloric acid, the aqueous phase was extracted with CHCl<sub>3</sub>. The extract was washed with brine and dried over Na<sub>2</sub>SO<sub>4</sub>, and concentrated under reduced pressure to leave the selenide (**14**), which was then dissolved in CH<sub>2</sub>Cl<sub>2</sub> (18 mL). The solution was cooled to 0 °C and treated with 30% hydrogen peroxide (27 mL). After the mixture was vigorously stirred for 1 h at the same temperature, the aqueous layer was extracted with CHCl<sub>3</sub>. The organic layer was washed with brine and dried over Na<sub>2</sub>SO<sub>4</sub>, and concentrated under reduced pressure to leave a residue, which

was subjected to column chromatography on silica gel. Elution with MeOH-CHCl<sub>3</sub> (2:98, v/v) afforded **15** (347mg, 85 %) as a white solid: Mp 156-157 °C (lit.<sup>4</sup> mp 157-158 °C); [ $\alpha$ ]<sub>D</sub> -204 (*c* = 0.4, CHCl<sub>3</sub>) {lit.<sup>4</sup> [ $\alpha$ ]<sub>D</sub> -224 (*c* = 0.4, CHCl<sub>3</sub>)}. The spectroscopic data of **15** were comparable to those reported in the literature.<sup>4</sup>

**(3aR,10aS,10bR)-Octahydro-2H-furo[3,2-c]pyrrolo[1,2-a]azepine-2,8(1H)-dione (16).**

To a stirred solution of **15** (26.8 mg, 0.13 mmol) in MeOH (2.5 mL) was added NiCl<sub>2</sub> · 6H<sub>2</sub>O (7.7 mg, 32.3  $\mu$ mol) followed by NaBH<sub>4</sub> (20 mg, 0.53 mmol) at -30 °C. After being stirred for 3 h at the same temperature, the solution was treated with 1M HCl. The aqueous layer was extracted with CHCl<sub>3</sub>, and the organic layer was washed with brine and dried over Na<sub>2</sub>SO<sub>4</sub>, and concentrated under reduced pressure to leave a residue, which was purified by column chromatography on silica gel. Elution with MeOH-CHCl<sub>3</sub> (2:98, v/v) afforded **16** (24.6 mg, 91%) as a colorless oil. [ $\alpha$ ]<sub>D</sub><sup>20</sup> -97.8 (*c* 0.3) {lit.<sup>4</sup> [ $\alpha$ ]<sub>D</sub><sup>20</sup> -94.0 (*c* 0.4 CHCl<sub>3</sub>)}. The spectroscopic data of **16** were comparable to those reported in the literature.

**SmI<sub>2</sub>-promoted cyclization of 11 to 16 in the presence of HMPA.** To a stirred solution of the aldehyde (**11**) (80.9 mg, 0.34 mmol) in THF (17 mL) in the presence of MeOH (68.6  $\mu$ L, 1.70 mmol) and HMPA (1.17 mL, 6.72 mmol) was added SmI<sub>2</sub> (0.2 M in THF solution, 8.5 mL, 1.69 mmol) at 0 °C under argon. After being stirred for 3 h, the resulting mixture was treated saturated aqueous NH<sub>4</sub>Cl solution and extracted with CHCl<sub>3</sub>. The organic layer was washed with brine and dried over Na<sub>2</sub>SO<sub>4</sub>. Evaporation of the solvent gave a residue, which was purified by column chromatography on silica gel. Elution with MeOH-CHCl<sub>3</sub> (2:98, v/v) gave **16** (39.2 mg, 55%) as a colorless oil, together with a small amount of its diastereoisomer (**17**). The spectroscopic data of **16** were identical with those of the authentic specimen obtained above. Although isolation of a minor product (**17**) was attempted, we could not obtain it in pure form, unfortunately, due to its small amount available.

**SmI<sub>2</sub>-promoted cyclization of 18 to 12 and 13 in the absence of HMPA.** To a stirred solution of the aldehyde (**11**) (50 mg, 0.20 mmol) in THF (10.5 mL) in the presence of EtOH (58  $\mu$ L, 0.99 mmol) was added SmI<sub>2</sub> (0.2 M in THF solution, 5.2 mL, 0.99 mmol) at 0 °C under argon. After being stirred for 3 h, the resulting mixture was treated saturated aqueous NH<sub>4</sub>Cl solution and extracted with CHCl<sub>3</sub>. The organic layer was

washed with brine and dried over Na<sub>2</sub>SO<sub>4</sub>. Evaporation of the solvent gave a mixture of **12** and **13** in 53% yield, in a ratio of *ca.* 0.7 : 1, based on the analysis of its <sup>1</sup>H NMR spectrum. Spectroscopic data of **12**<sup>1</sup> and **13**<sup>2,3</sup> were similar to those reported in the literature.

**SmI<sub>2</sub>-promoted cyclization of 18 to 16 in the presence of HMPA.** To a stirred solution of the aldehyde (**18**) (32 mg, 0.13 mmol) in THF (6.4 mL) in the presence of EtOH (38 μL, 0.65 mmol) and HMPA (0.44 mL, 2.53 mmol) was added SmI<sub>2</sub> (0.2 M in THF solution, 3.2 mL, 0.64 mmol) at 0 °C under argon. After being stirred for 3 h, the resulting mixture was treated saturated aqueous NH<sub>4</sub>Cl solution and extracted with CHCl<sub>3</sub>. The organic layer was washed with brine and dried over Na<sub>2</sub>SO<sub>4</sub>. Evaporation of the solvent gave a residue, which was purified by column chromatography on silica gel. Elution with MeOH-CHCl<sub>3</sub> (2:98, v/v) gave **16** and **17** in 49% yield in a ratio of 3.5 : 1.

**(1S,3aR,10aS,10bR)-1-Methyloctahydro-2H-furo[3,2-c]pyrrolo[1,2-a]azepine-2,8(1H)-dione; (-)-Stemoamide (1).** To a stirred solution of the lactone (**16**) (37 mg, 0.18 mmol) in THF (2.3 mL) was added LiHMDS (1.6M in THF solution, 0.2 mL, 0.19 mmol) at -78 °C. After being stirred for 30 min, MeI (55 μL, 0.88 mmol) was added and the resulting mixture was stirred for 3 h at the same temperature. The mixture was allowed to warm to room temperature gradually and was stirred at room temperature for 20 h. After treatment with saturated aqueous NH<sub>4</sub>Cl solution, the whole was extracted with EtOAc. The extract was washed with brine and dried over Na<sub>2</sub>SO<sub>4</sub>. Evaporation of the solvent gave a residue, which was purified by column chromatography on silica gel. Elution with MeOH-CHCl<sub>3</sub> (3:97, v/v) gave (-)-stemoamide (**1**) (32.2 mg, 82%) as a white solid: Mp 184-185 °C (lit.<sup>4</sup> mp 185-186 °C); [α]<sup>20</sup><sub>D</sub> -138 (c 0.2, MeOH) {lit.<sup>4</sup> [α]<sup>20</sup><sub>D</sub> -141 (c 0.3 MeOH)}. The spectroscopic data of **1** were comparable to those reported in the literature.<sup>4</sup>

---

(1) M. P. Sibi and T. Subramanian, *T. Synlett*, 2004, 1211.

(2) N. Bogliotti, P. I. Dalko, and J. Cossy, *J. Org. Chem.*, 2006, **71**, 9528.

(3) P. Gao, Z. Tong, H. Hu, P.-F. Xu, W. Liu, C. Sun, and H. Zhai, *Synlett*, 2009, 2188.

(4) S. Torssell, E. Wanngren, and P. Somfai, *J. Org. Chem.*, 2007, **72**, 4246.

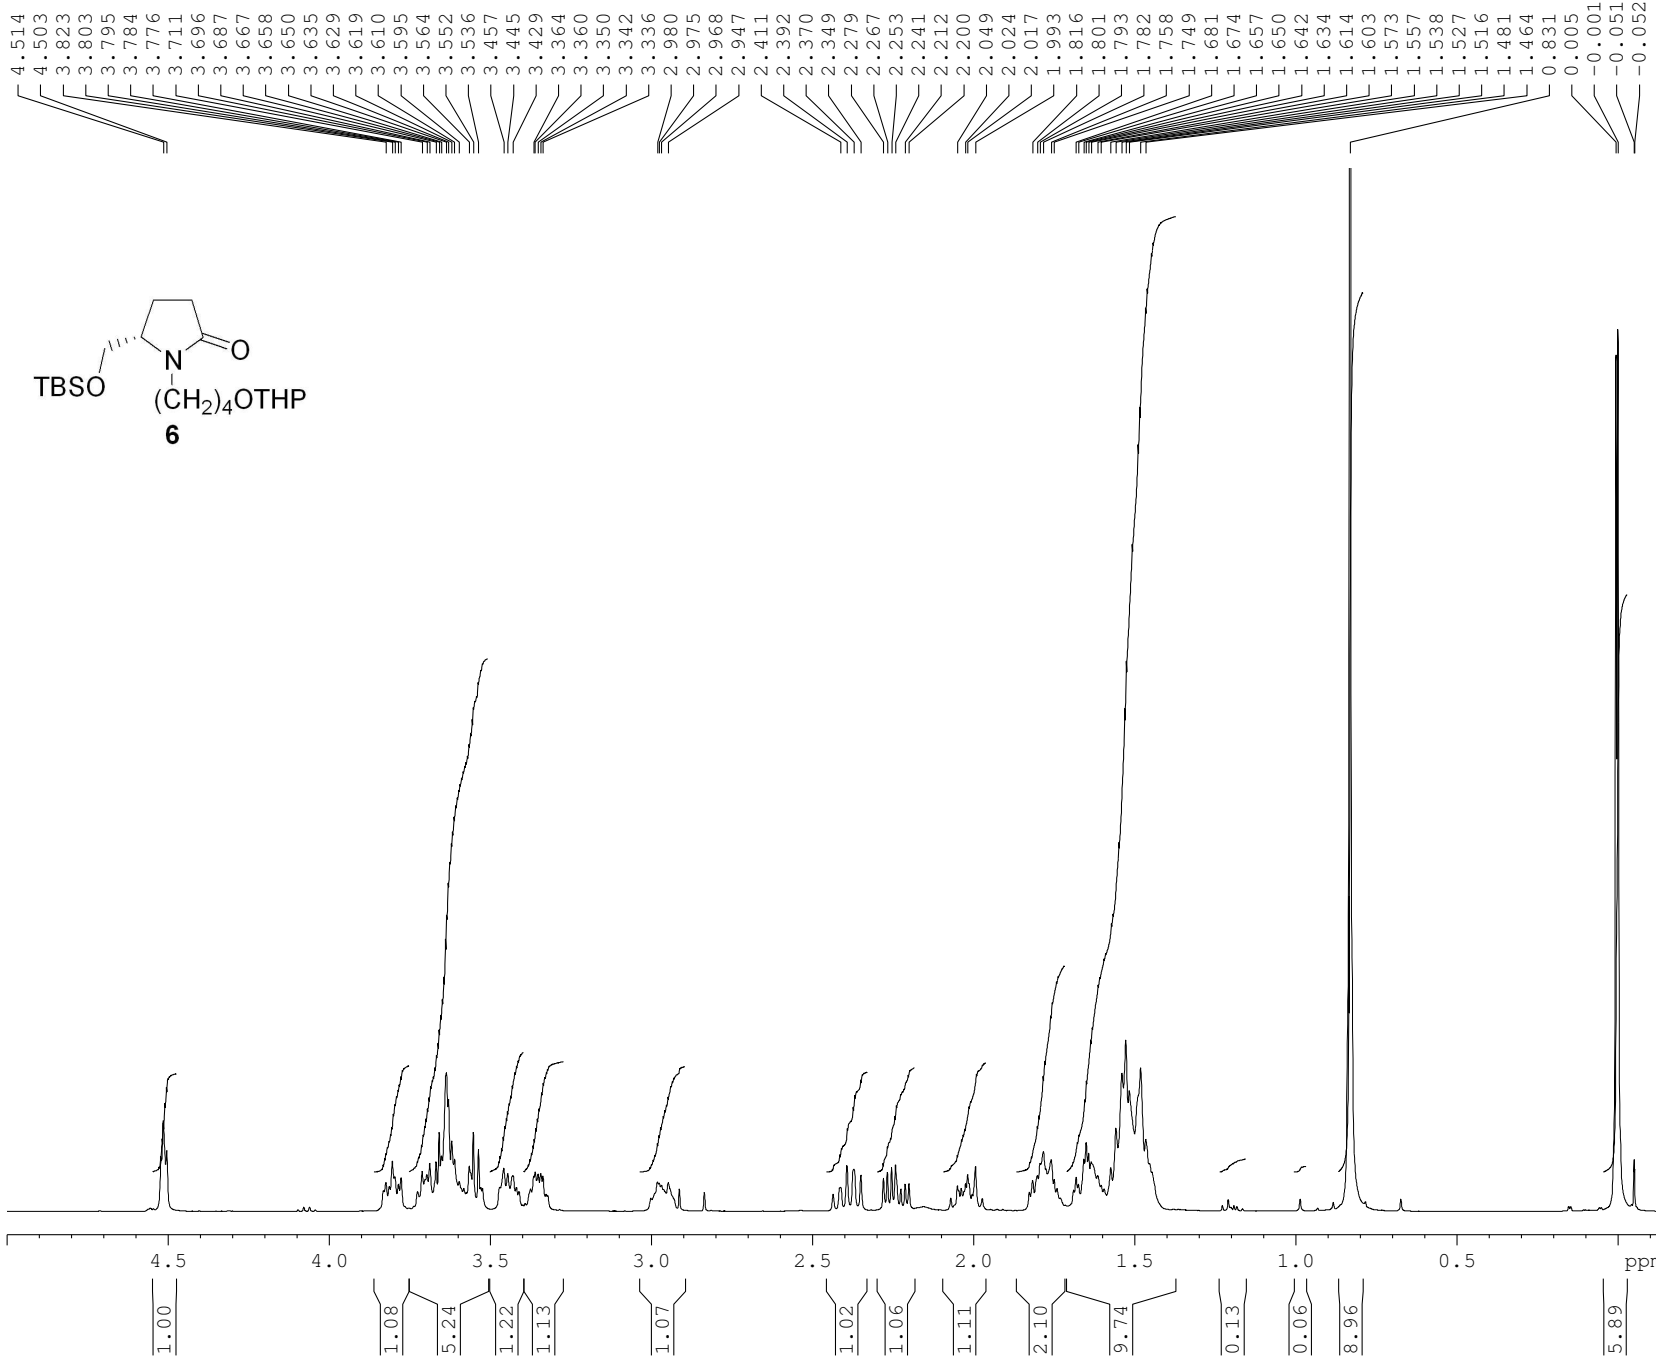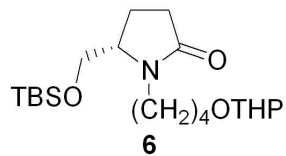

Current Data Parameters  
 NAME 20090926 pure  
 EXPNO 1  
 PROCNO 1

F2 - Acquisition Parameters  
 Date\_ 20090926  
 Time 15.21  
 INSTRUM spect  
 PROBHD 5 mm PABBO BB-  
 PULPROG zg30  
 TD 65536  
 SOLVENT CDCl3  
 NS 16  
 DS 2  
 SWH 8223.685 Hz  
 FIDRES 0.125483 Hz  
 AQ 3.9846387 sec  
 RG 36  
 DW 60.800 usec  
 DE 6.00 usec  
 TE 673.2 K  
 D1 1.00000000 sec  
 TD0 1

==== CHANNEL f1 =====  
 NUC1 1H  
 P1 12.80 usec  
 PL1 -2.00 dB  
 PL1W 12.65980816 W  
 SFO1 400.1324710 MHz

F2 - Processing parameters  
 SI 32768  
 SF 400.1300096 MHz  
 WDW EM  
 SSB 0  
 LB 0.30 Hz  
 GB 0  
 PC 1.00



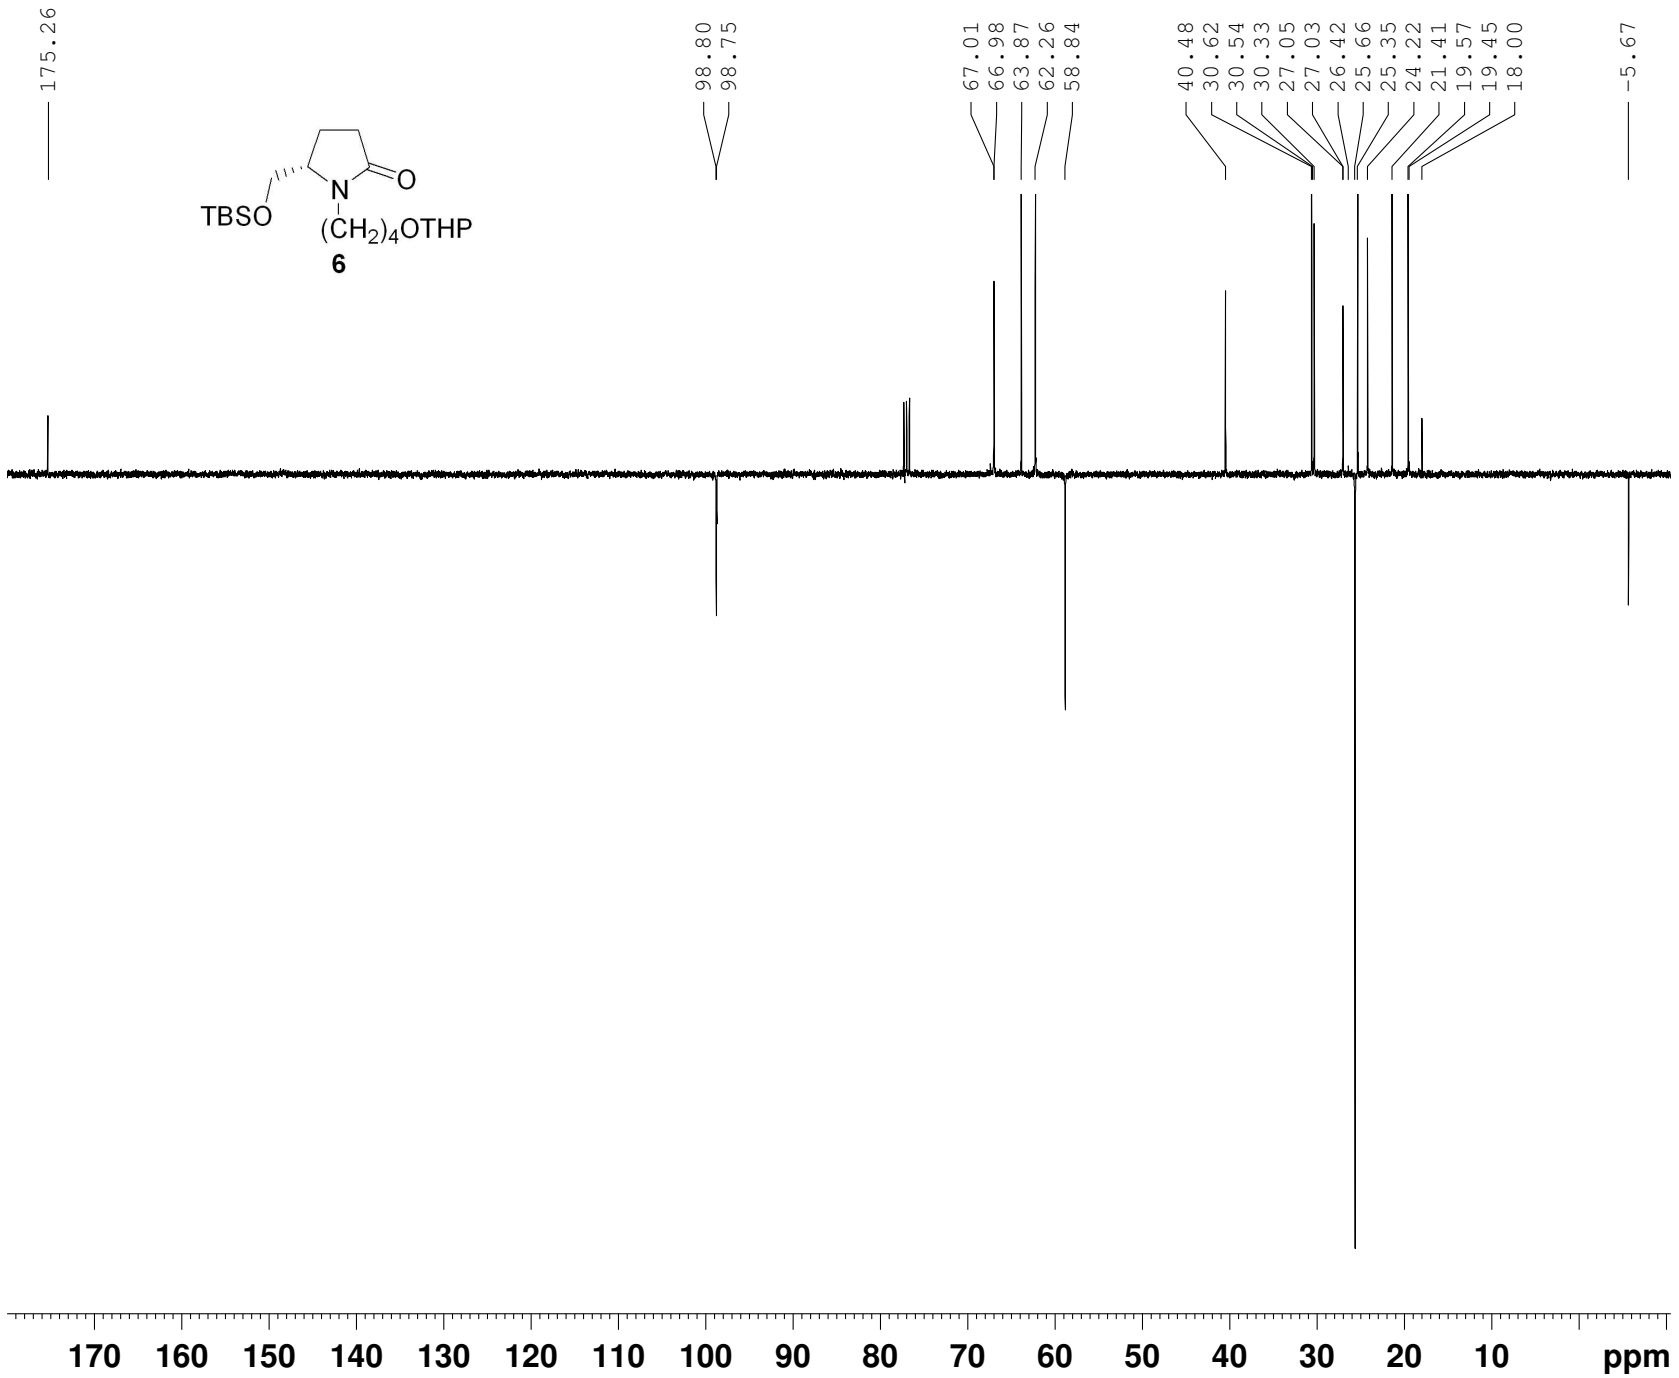

Current Data Parameters  
NAME 20090926 pure carbon  
EXPNO 1  
PROCNO 1

F2 - Acquisition Parameters  
Date\_ 20090926  
Time 15.34  
INSTRUM spect  
PROBHD 5 mm PABBO BB-  
PULPROG jmod  
TD 65536  
SOLVENT cdcl3  
NS 169  
DS 4  
SMH 24038.461 Hz  
FIDRES 0.366798 Hz  
AQ 1.3631988 sec  
RG 2050  
DW 20.800 usec  
DE 6.00 usec  
TE 673.2 K  
CNST2 145.0000000  
CNST11 1.0000000  
D1 2.0000000 sec  
D20 0.00689655 sec  
TD0 1

===== CHANNEL f1 =====  
NUC1 13C  
P1 8.80 usec  
P2 17.60 usec  
PL1 -2.00 dB  
PL1W 54.93878937 W  
SFO1 100.6228298 MHz

===== CHANNEL f2 =====  
CPDPRG2 waltz16  
NUC2 1H  
PCPD2 80.00 usec  
PL2 0.00 dB  
PL12 14.30 dB  
PL2W 7.98779869 W  
PL12W 0.29677486 W  
SFO2 400.1316005 MHz

F2 - Processing parameters  
SI 32768  
SF 100.6127776 MHz  
NDW EM  
SSB 0  
LB 1.00 Hz  
GB 0  
PC 1.40

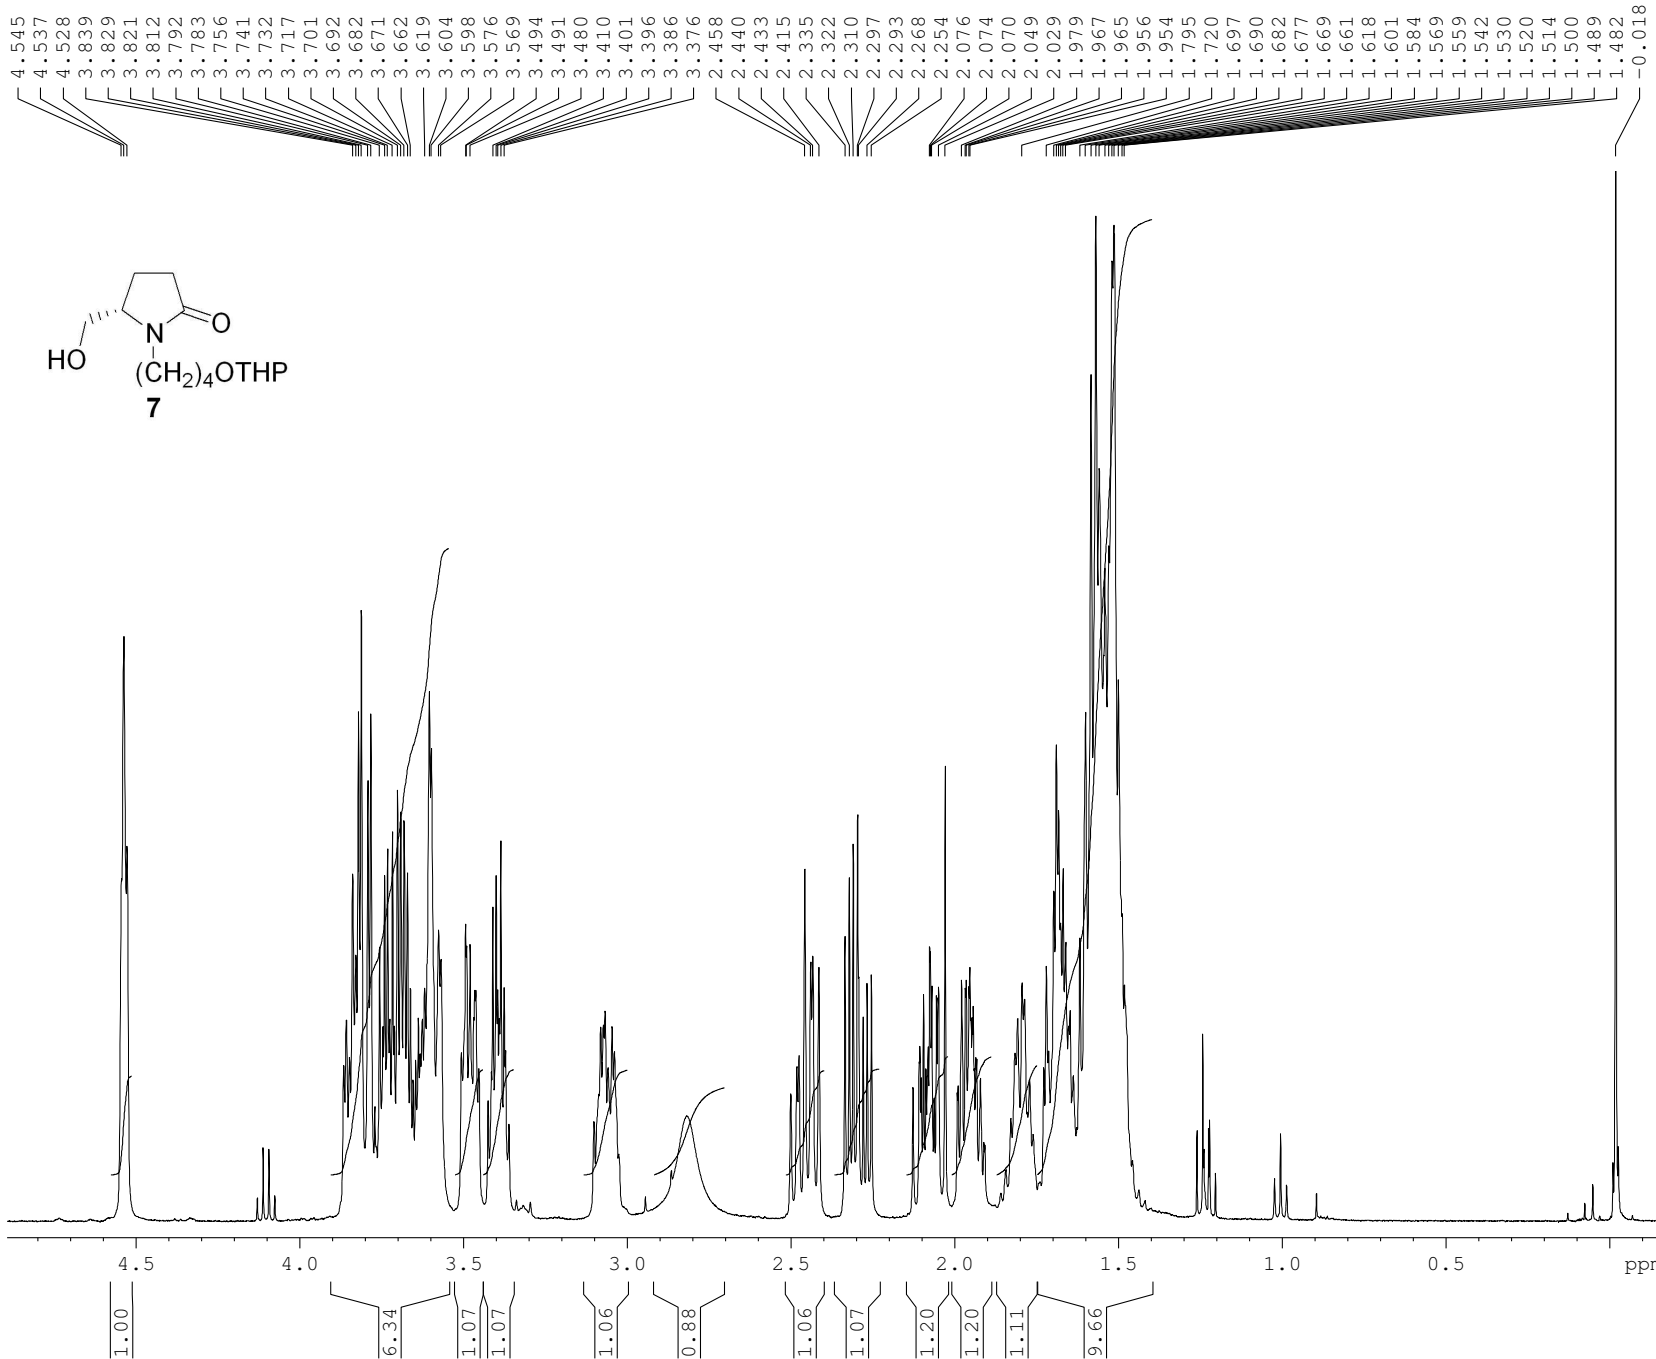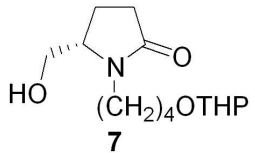

Current Data Parameters  
 NAME 20090929 pure  
 EXPNO 1  
 PROCNO 1

F2 - Acquisition Parameters  
 Date\_ 20090929  
 Time 16.37  
 INSTRUM spect  
 PROBHD 5 mm PABBO BB-  
 PULPROG zg30  
 TD 65536  
 SOLVENT CDCl3  
 NS 16  
 DS 2  
 SWH 8223.685 Hz  
 FIDRES 0.125483 Hz  
 AQ 3.9846387 sec  
 RG 128  
 DW 60.800 usec  
 DE 6.00 usec  
 TE 673.2 K  
 D1 1.00000000 sec  
 TD0 1

==== CHANNEL f1 =====  
 NUC1 1H  
 P1 12.80 usec  
 PL1 -2.00 dB  
 PL1W 12.65980816 W  
 SFO1 400.1324710 MHz

F2 - Processing parameters  
 SI 32768  
 SF 400.1300098 MHz  
 WDW EM  
 SSB 0  
 LB 0.30 Hz  
 GB 0  
 PC 1.00

175.88

99.07

67.04  
67.00  
62.80  
62.58  
59.13

40.52  
40.48  
30.70  
30.47  
26.96  
25.38  
24.34  
24.26  
21.15  
19.75

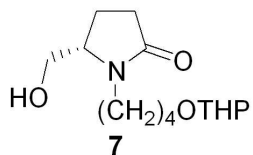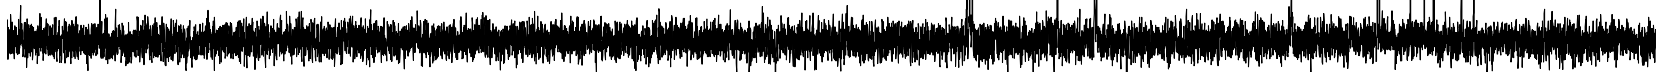

Current Data Parameters  
 NAME 20090929 pure carbon  
 EXPNO 1  
 PROCNO 1

F2 - Acquisition Parameters  
 Date\_ 20090929  
 Time 16.48  
 INSTRUM spect  
 PROBHD 5 mm PABBO BB-  
 PULPROG jmod  
 TD 65536  
 SOLVENT CDC13  
 NS 125  
 DS 4  
 SMH 24038.461 Hz  
 FIDRES 0.366798 Hz  
 AQ 1.3631988 sec  
 RG 2050  
 DW 20.800 usec  
 DE 6.00 usec  
 TE 673.2 K  
 CNST2 145.0000000  
 CNST11 1.0000000  
 D1 2.0000000 sec  
 D20 0.00689655 sec  
 TD0 1

===== CHANNEL f1 =====  
 NUC1 13C  
 P1 8.80 usec  
 P2 17.60 usec  
 PL1 -2.00 dB  
 PL1W 54.93878937 W  
 SFO1 100.6228298 MHz

===== CHANNEL f2 =====  
 CPDPRG2 waltz16  
 NUC2 1H  
 PCPD2 80.00 usec  
 PL2 0.00 dB  
 PL12 14.30 dB  
 PL2W 7.98779869 W  
 PL12W 0.29677486 W  
 SFO2 400.1316005 MHz

F2 - Processing parameters  
 SI 32768  
 SF 100.6127728 MHz  
 NDW EM  
 SSB 0  
 LB 1.00 Hz  
 GB 0  
 PC 1.40

180 170 160 150 140 130 120 110 100 90 80 70 60 50 40 30 20 10 ppm

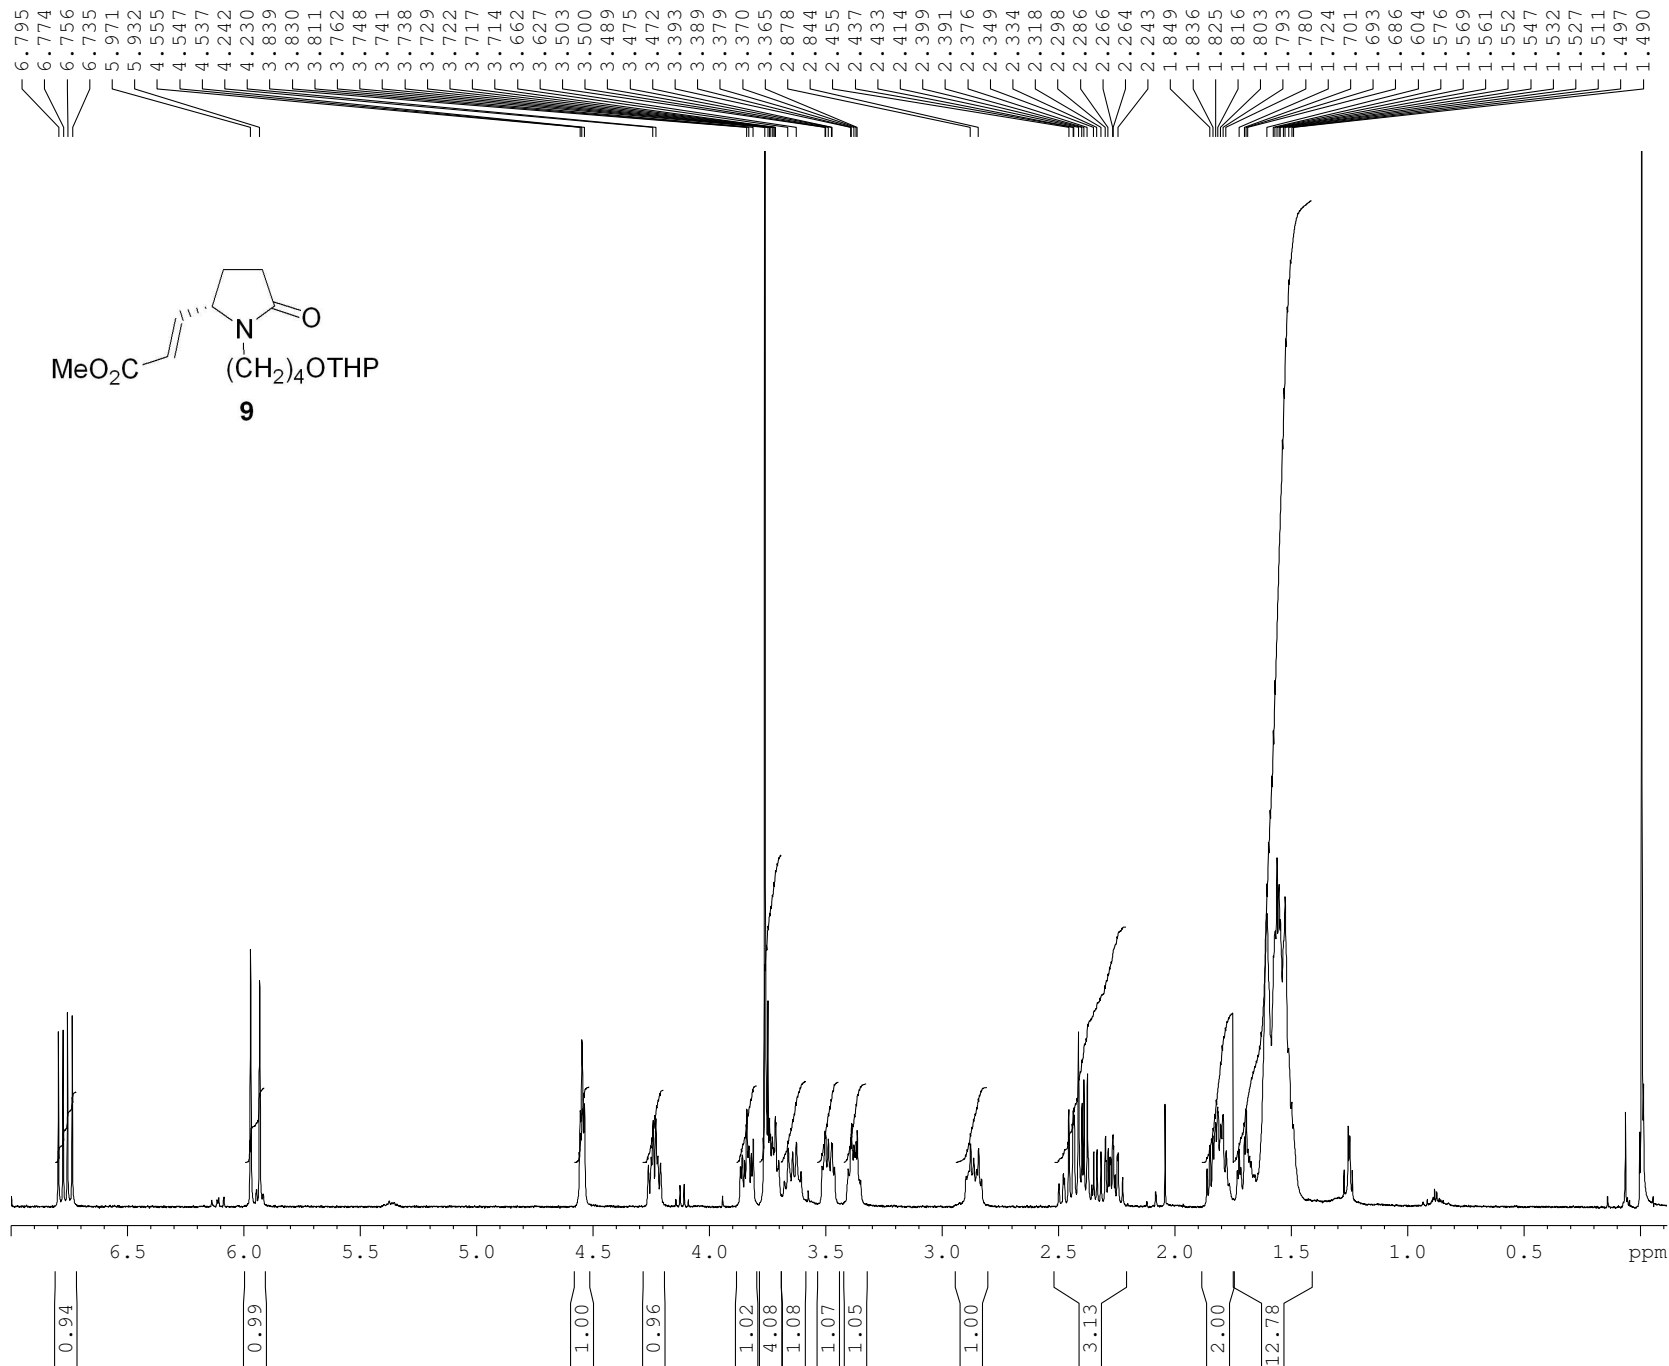

Current Data Parameters  
 NAME 20091006 thp pure  
 EXPNO 1  
 PROCNO 1

F2 - Acquisition Parameters  
 Date\_ 20091006  
 Time 20.36  
 INSTRUM spect  
 PROBHD 5 mm PABBO BB-  
 PULPROG zg30  
 TD 65536  
 SOLVENT CDCl3  
 NS 16  
 DS 2  
 SWH 8223.685 Hz  
 FIDRES 0.125483 Hz  
 AQ 3.9846387 sec  
 RG 228  
 DW 60.800 usec  
 DE 6.00 usec  
 TE 673.2 K  
 D1 1.00000000 sec  
 TD0 1

===== CHANNEL f1 =====  
 NUC1 1H  
 P1 12.80 usec  
 PL1 -2.00 dB  
 PL1W 12.65980816 W  
 SFO1 400.1324710 MHz

F2 - Processing parameters  
 SI 32768  
 SF 400.1300099 MHz  
 WDW EM  
 SSB 0  
 LB 0.30 Hz  
 GB 0  
 PC 1.00

174.69  
165.97  
146.57

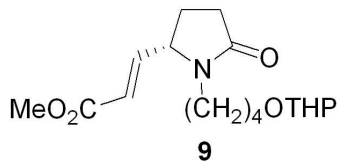

122.74

98.93  
98.85

66.92  
66.87  
62.40  
62.38  
58.79  
58.76  
51.81

40.78  
30.68  
29.63  
27.01  
26.98  
25.40  
24.86  
24.20  
19.65

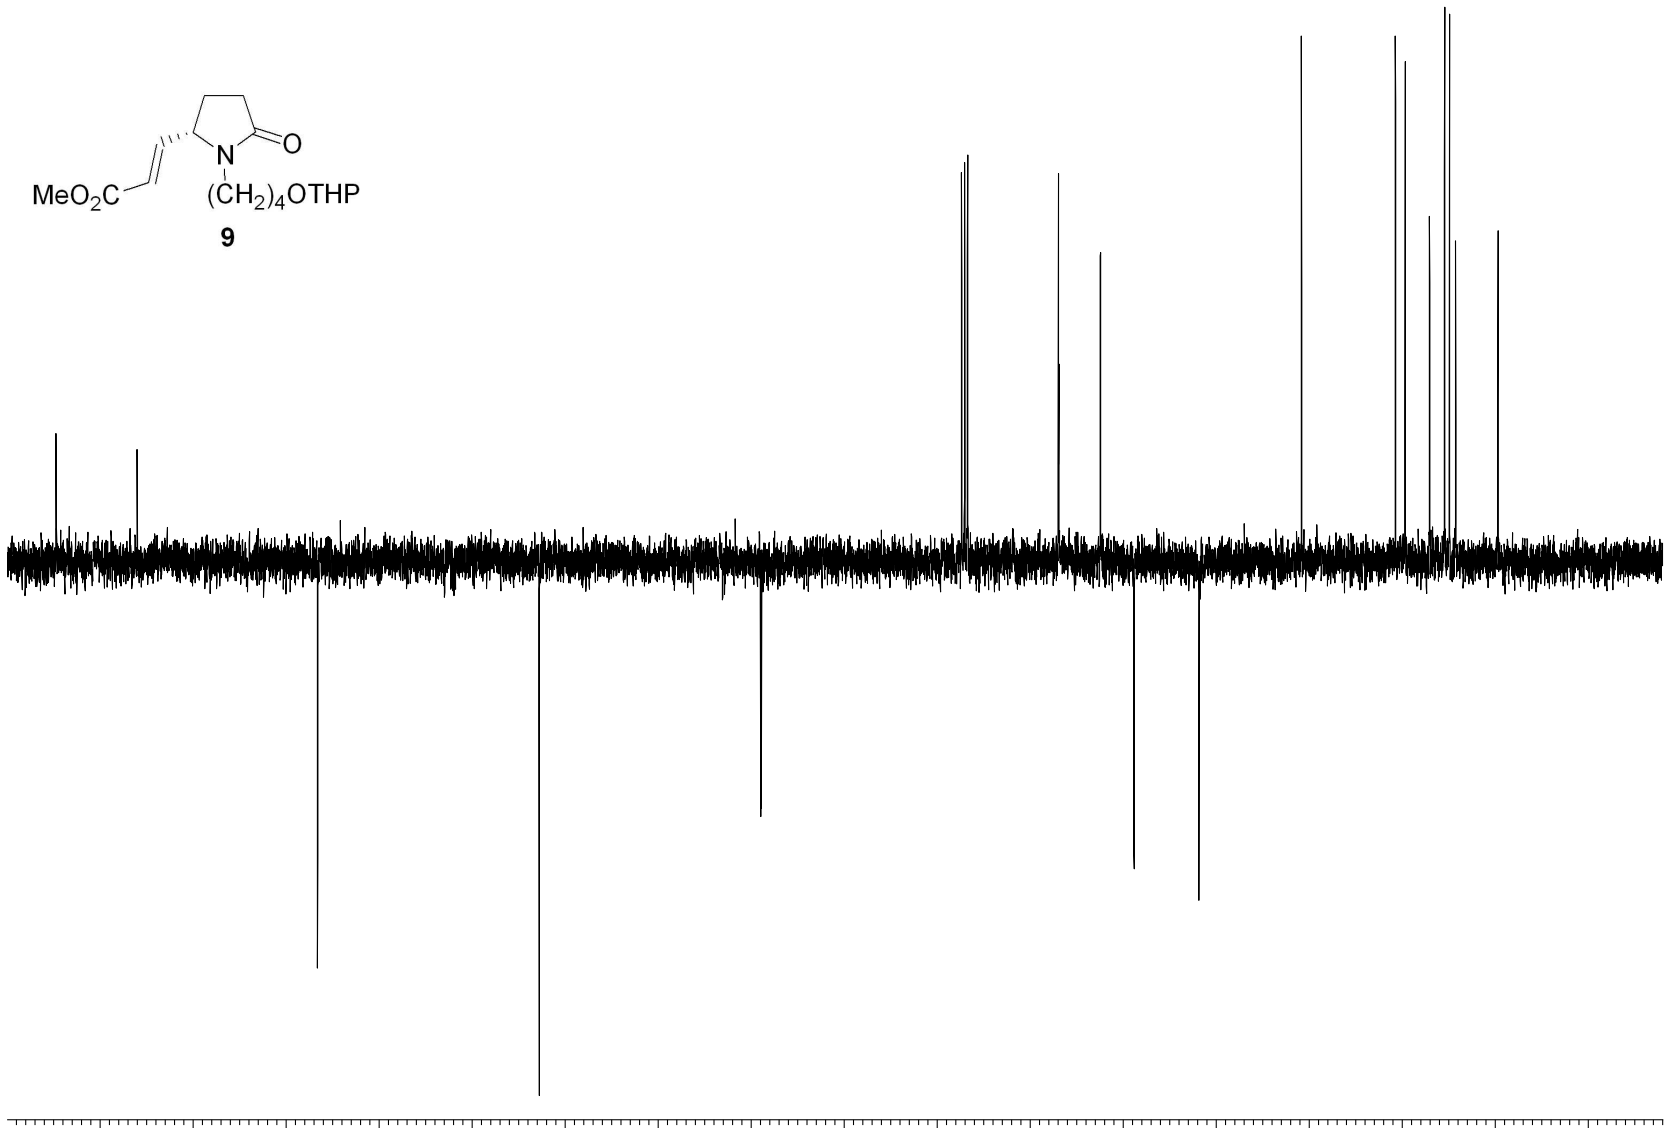

Current Data Parameters  
NAME 20090930 pure carbon  
EXPNO 1  
PROCNO 1

F2 - Acquisition Parameters  
Date\_ 20090930  
Time 22.20  
INSTRUM spect  
PROBHD 5 mm PABBO BB-  
PULPROG jmod  
TD 65536  
SOLVENT CDC13  
NS 135  
DS 4  
SMH 24038.461 Hz  
FIDRES 0.366798 Hz  
AQ 1.3631988 sec  
RG 2050  
DW 20.800 usec  
DE 6.00 usec  
TE 673.2 K  
CNST2 145.0000000  
CNST11 1.0000000  
D1 2.0000000 sec  
D20 0.00689655 sec  
TD0 1

===== CHANNEL f1 =====  
NUC1 13C  
P1 8.80 usec  
P2 17.60 usec  
PL1 -2.00 dB  
PL1W 54.93878937 W  
SFO1 100.6228298 MHz

===== CHANNEL f2 =====  
CPDPRG2 waltz16  
NUC2 1H  
PCPD2 80.00 usec  
PL2 0.00 dB  
PL12 14.30 dB  
PL2W 7.98779869 W  
PL12W 0.29677486 W  
SFO2 400.1316005 MHz

F2 - Processing parameters  
SI 32768  
SF 100.6127735 MHz  
NDW EM  
SSB 0  
LB 1.00 Hz  
GB 0  
PC 1.40

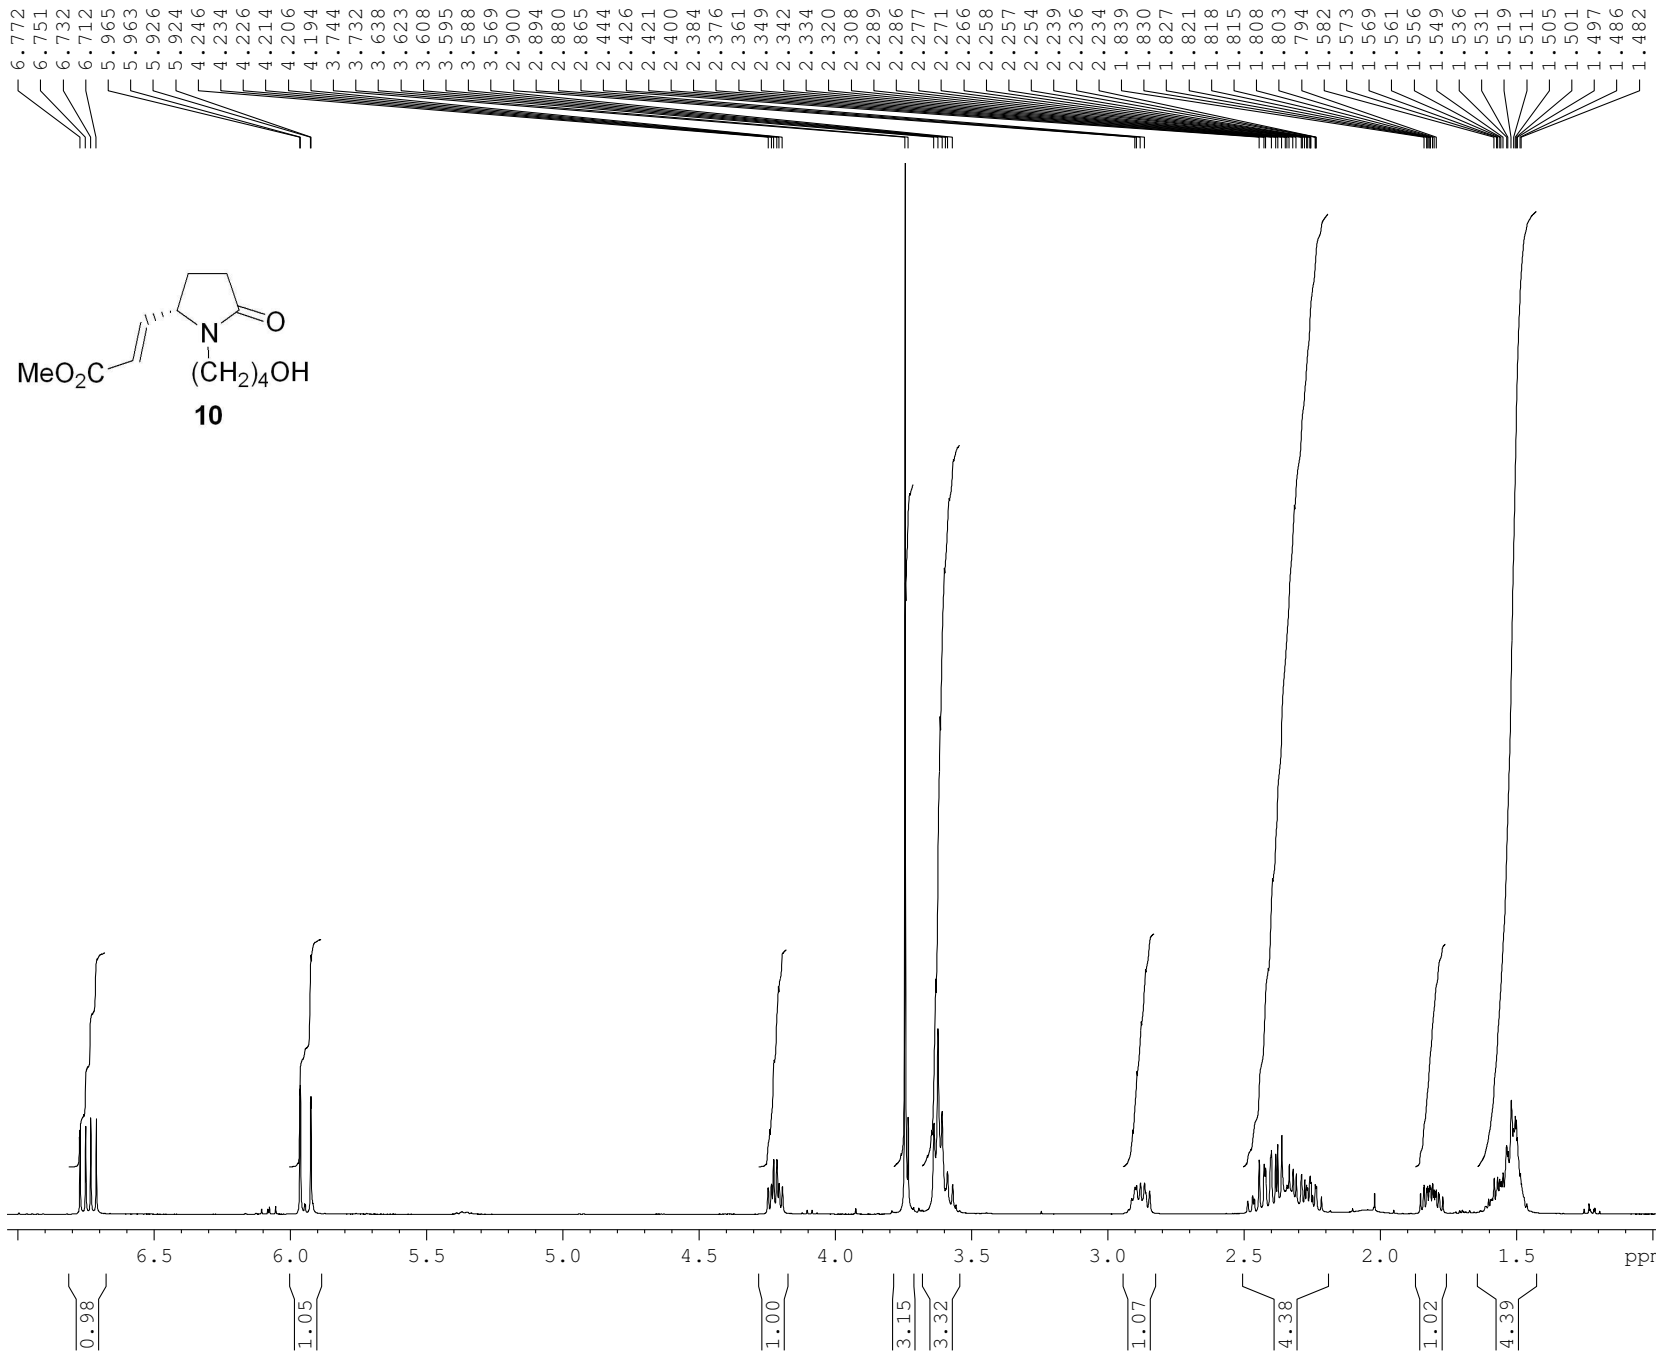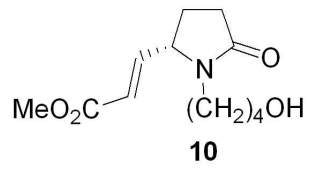

```

Current Data Parameters
NAME      20091003 wit alcohol
EXPNO    1
PROCNO   1

F2 - Acquisition Parameters
Date_    20091003
Time     13.59
INSTRUM  spect
PROBHD   5 mm PABBO BB-
PULPROG  zg30
TD       65536
SOLVENT  CDCl3
NS       16
DS       2
SWH      8223.685 Hz
FIDRES   0.125483 Hz
AQ       3.9846387 sec
RG       114
DW       60.800 usec
DE       6.00 usec
TE       673.2 K
D1       1.00000000 sec
TD0      1

===== CHANNEL f1 =====
NUC1     1H
P1       12.80 usec
PL1      -2.00 dB
PL1W     12.65980816 W
SFO1     400.1324710 MHz

F2 - Processing parameters
SI       32768
SF       400.1300096 MHz
WDW      EM
SSB      0
LB       0.30 Hz
GB       0
PC       1.00
  
```

175.00  
165.98  
146.40  
122.88

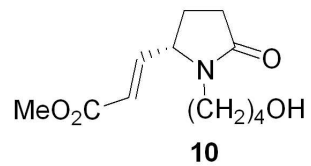

62.08  
58.91  
51.83  
40.68  
29.64  
29.46  
24.86  
23.84

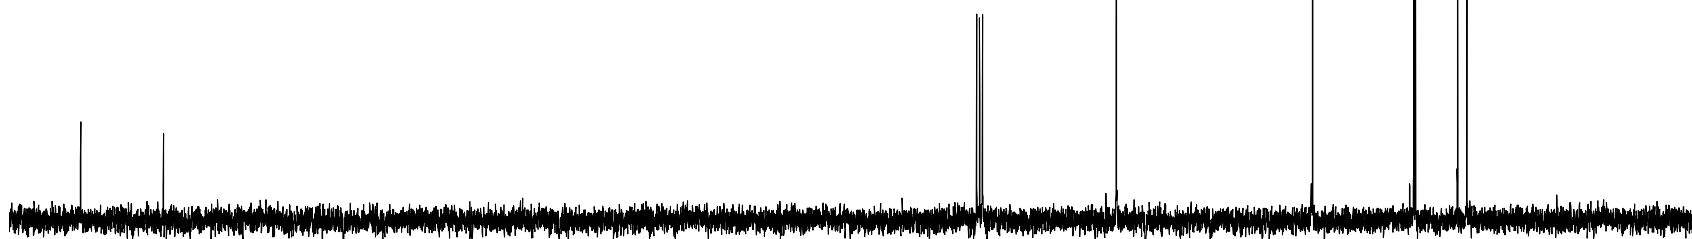

Current Data Parameters  
NAME 20091003 wit alcohol carbon  
EXPNO 1  
PROCNO 1

F2 - Acquisition Parameters  
Date\_ 20091003  
Time 14.08  
INSTRUM spect  
PROBHD 5 mm PABBO BB-  
PULPROG jmod  
TD 65536  
SOLVENT CDC13  
NS 109  
DS 4  
SWH 24038.461 Hz  
FIDRES 0.366798 Hz  
AQ 1.3631988 sec  
RG 2050  
DW 20.800 usec  
DE 6.00 usec  
TE 673.2 K  
CNST2 145.000000  
CNST11 1.000000  
D1 2.0000000 sec  
D20 0.00689655 sec  
TD0 1

===== CHANNEL f1 =====  
NUC1 13C  
P1 8.80 usec  
P2 17.60 usec  
PL1 -2.00 dB  
PL1W 54.93878937 W  
SFO1 100.6228298 MHz

===== CHANNEL f2 =====  
CPDPRG2 waltz16  
NUC2 1H  
PCPD2 80.00 usec  
PL2 0.00 dB  
PL12 14.30 dB  
PL2W 7.98779869 W  
PL12W 0.29677486 W  
SFO2 400.1316005 MHz

F2 - Processing parameters  
SI 32768  
SF 100.6127745 MHz  
WDW EM  
SSB 0  
LB 1.00 Hz  
GB 0  
PC 1.40

170 160 150 140 130 120 110 100 90 80 70 60 50 40 30 20 ppm

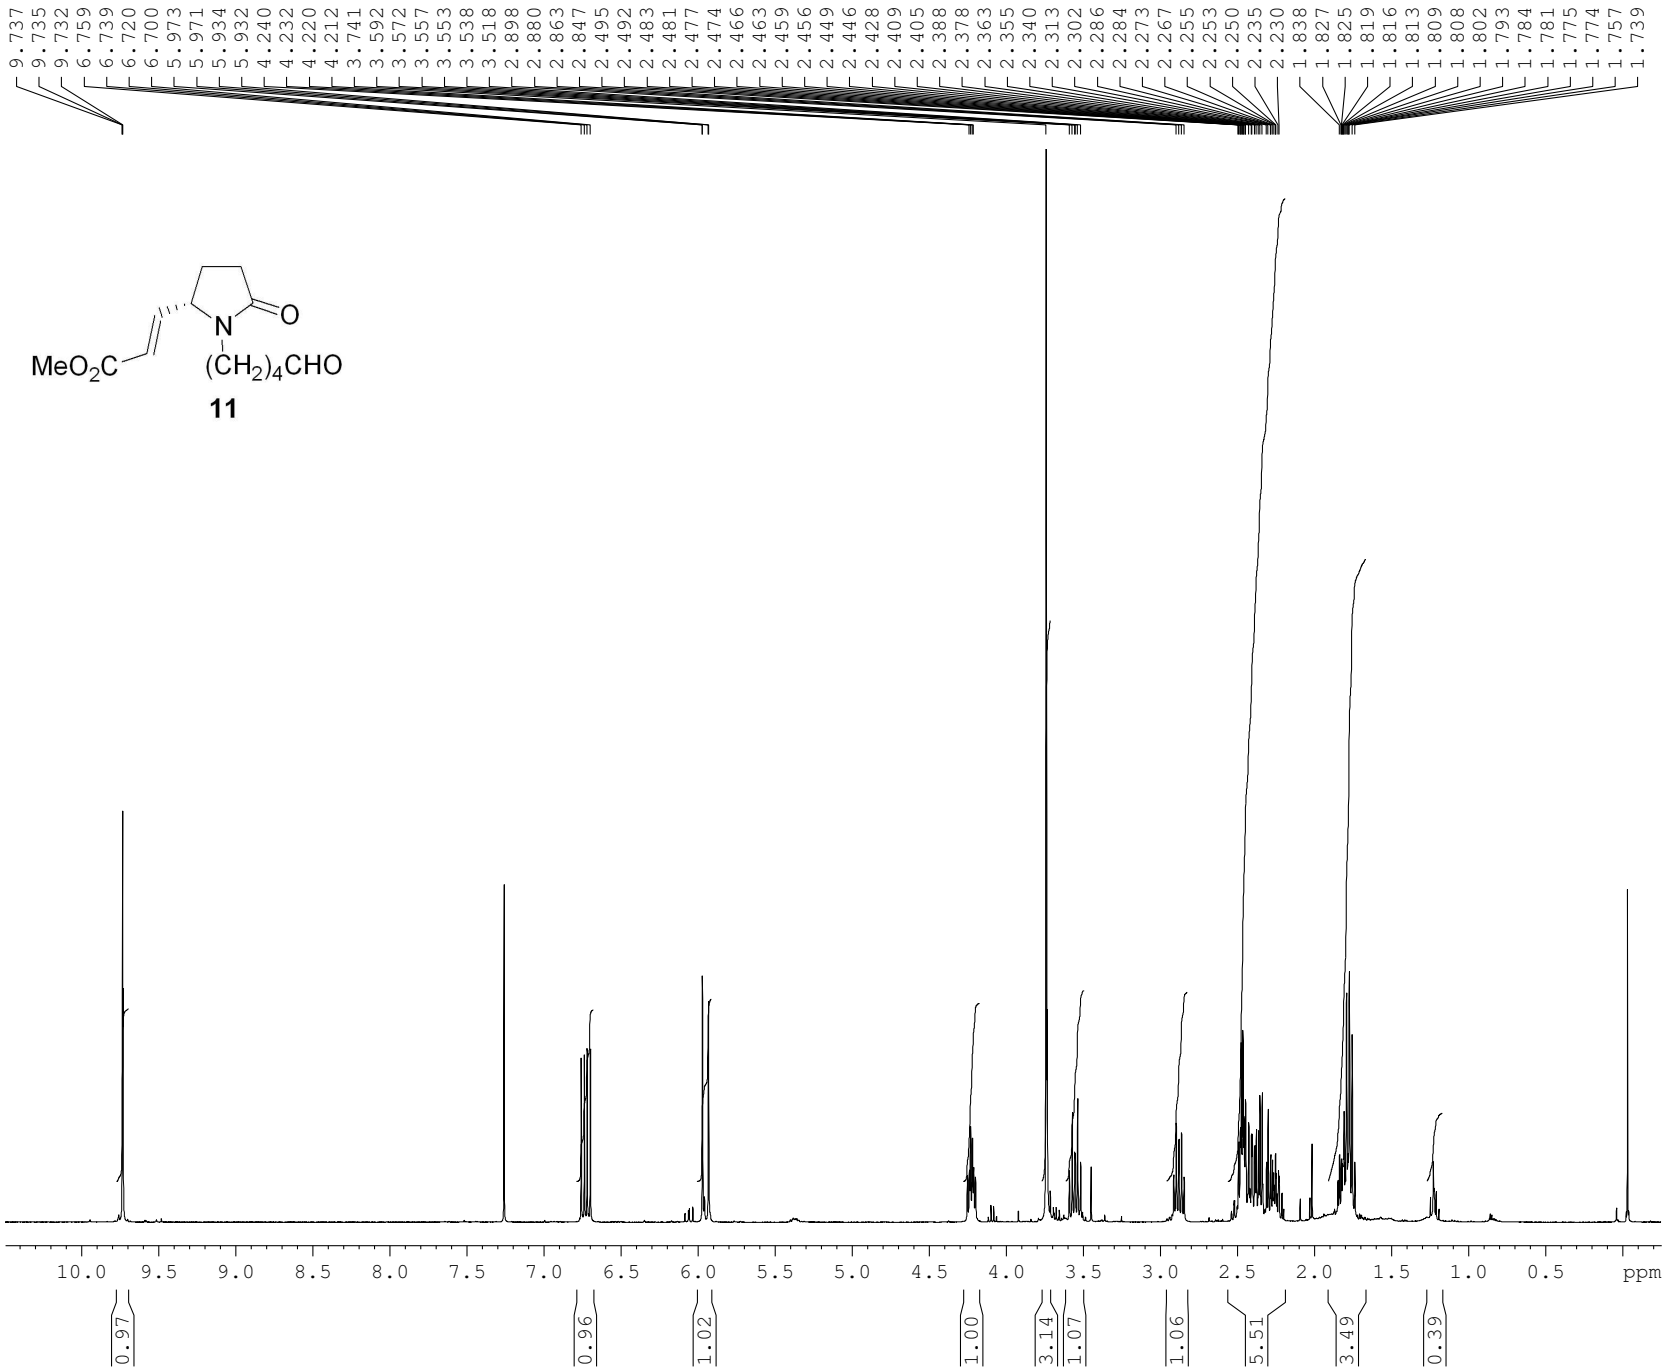

```

Current Data Parameters
NAME      20091005 pure
EXPNO    1
PROCNO   1

F2 - Acquisition Parameters
Date_    20091005
Time     18.39
INSTRUM spect
PROBHD   5 mm PABBO BB-
PULPROG zg30
TD       65536
SOLVENT  CDC13
NS       16
DS       2
SWH      8223.685 Hz
FIDRES   0.125483 Hz
AQ       3.9846387 sec
RG       144
DW       60.800 usec
DE       6.00 usec
TE       673.2 K
D1       1.00000000 sec
TD0      1

===== CHANNEL f1 =====
NUC1     1H
P1       12.80 usec
PL1      -2.00 dB
PL1W    12.65980816 W
SFO1    400.1324710 MHz

F2 - Processing parameters
SI       32768
SF       400.1300096 MHz
WDW      EM
SSB      0
LB       0.30 Hz
GB       0
PC       1.00

```



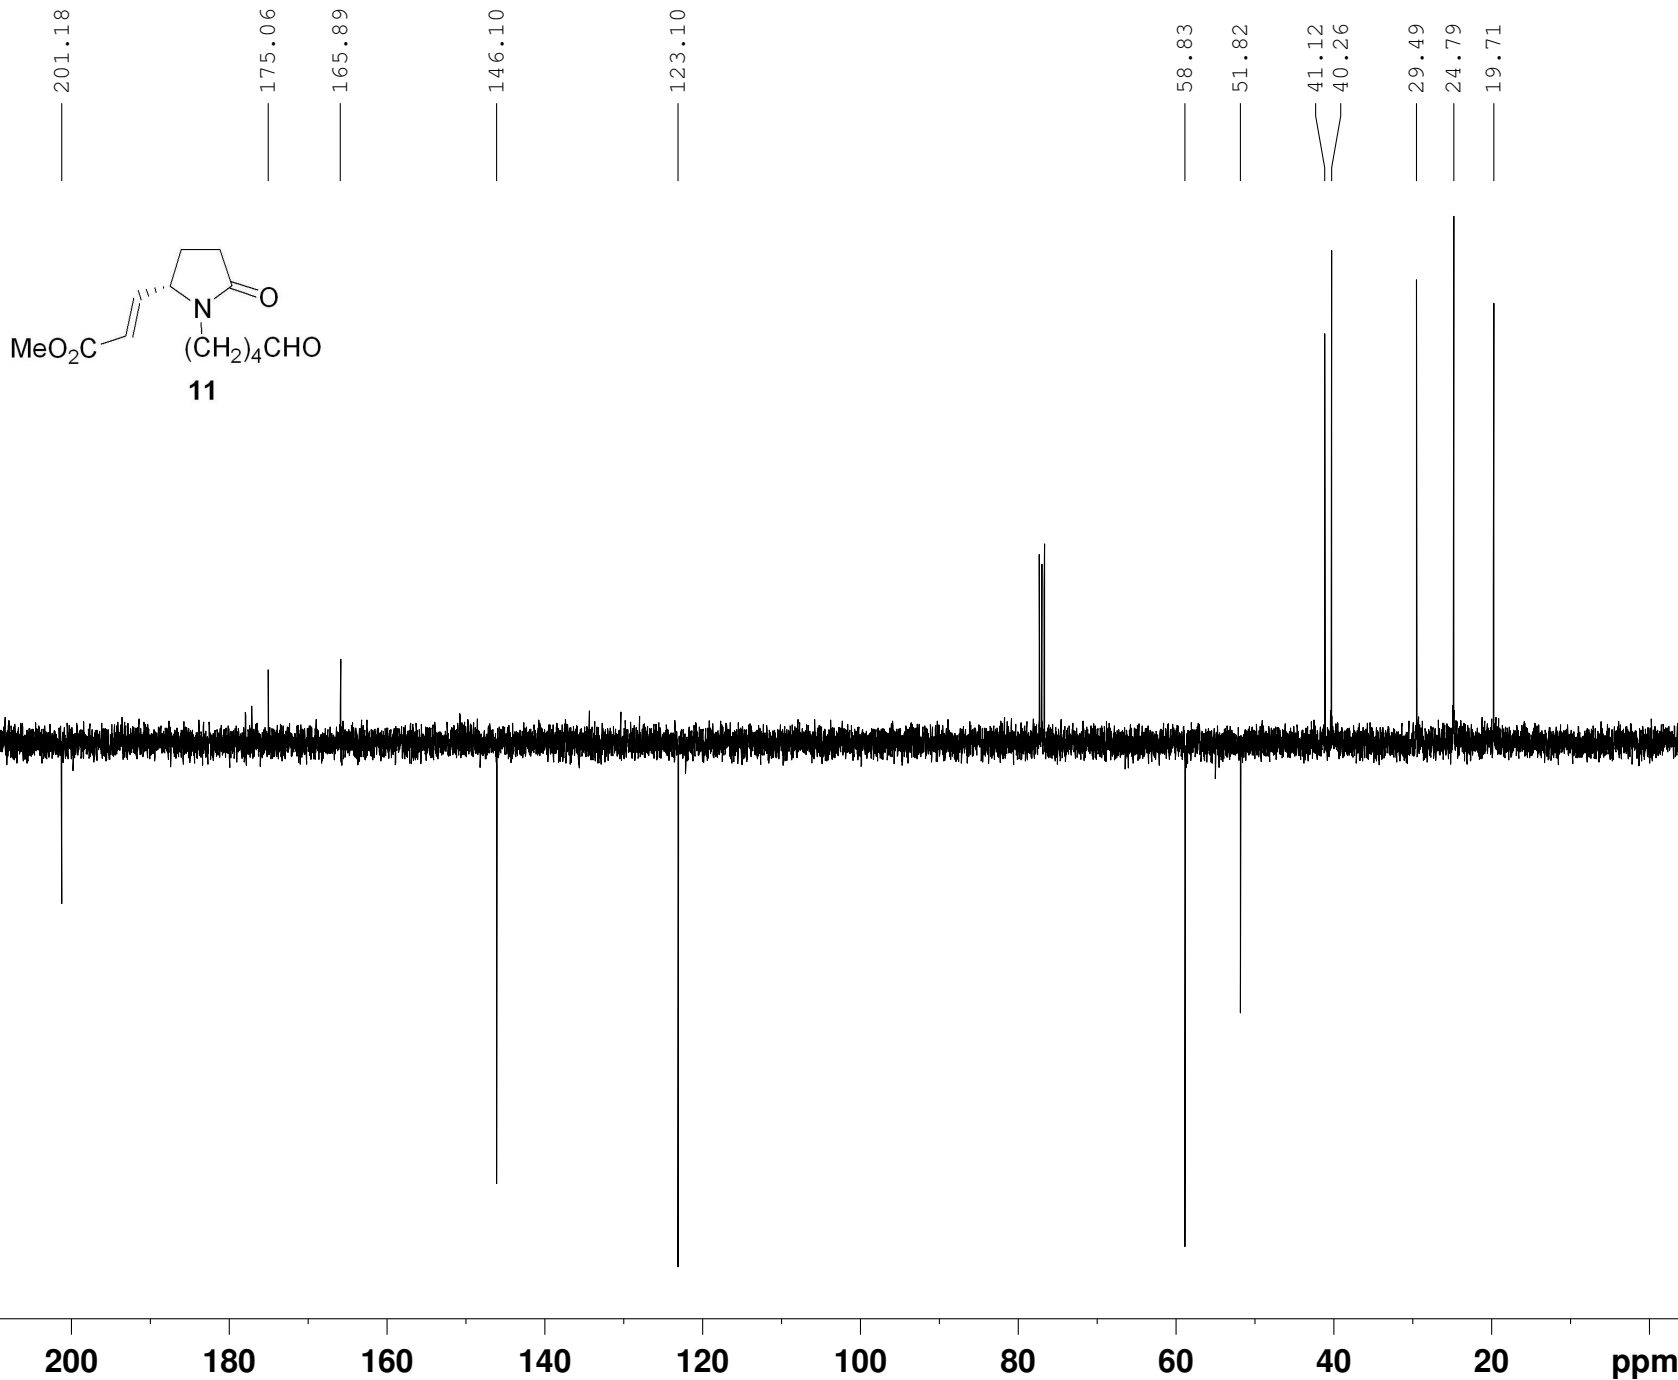

Current Data Parameters  
 NAME 20091005 pure carbon  
 EXPNO 1  
 PROCNO 1

F2 - Acquisition Parameters  
 Date\_ 20091005  
 Time 19.07  
 INSTRUM spect  
 PROBHD 5 mm PABBO BB-  
 PULPROG jmod  
 TD 65536  
 SOLVENT CDCl3  
 NS 63  
 DS 4  
 SWH 24038.461 Hz  
 FIDRES 0.366798 Hz  
 AQ 1.3631988 sec  
 RG 2050  
 DW 20.800 usec  
 DE 6.00 usec  
 TE 673.2 K  
 CNST2 145.0000000  
 CNST11 1.0000000  
 D1 2.0000000 sec  
 D20 0.00689655 sec  
 TD0 1

===== CHANNEL f1 =====  
 NUC1 13C  
 P1 8.80 usec  
 P2 17.60 usec  
 PL1 -2.00 dB  
 PL1W 54.93878937 W  
 SFO1 100.6228298 MHz

===== CHANNEL f2 =====  
 CPDPRG2 waltz16  
 NUC2 1H  
 PCPD2 80.00 usec  
 PL2 0.00 dB  
 PL12 14.30 dB  
 PL2W 7.98779869 W  
 PL12W 0.29677486 W  
 SFO2 400.1316005 MHz

F2 - Processing parameters  
 SI 32768  
 SF 100.6127758 MHz  
 NDW EM  
 SSB 0  
 LB 1.00 Hz  
 GB 0  
 PC 1.40

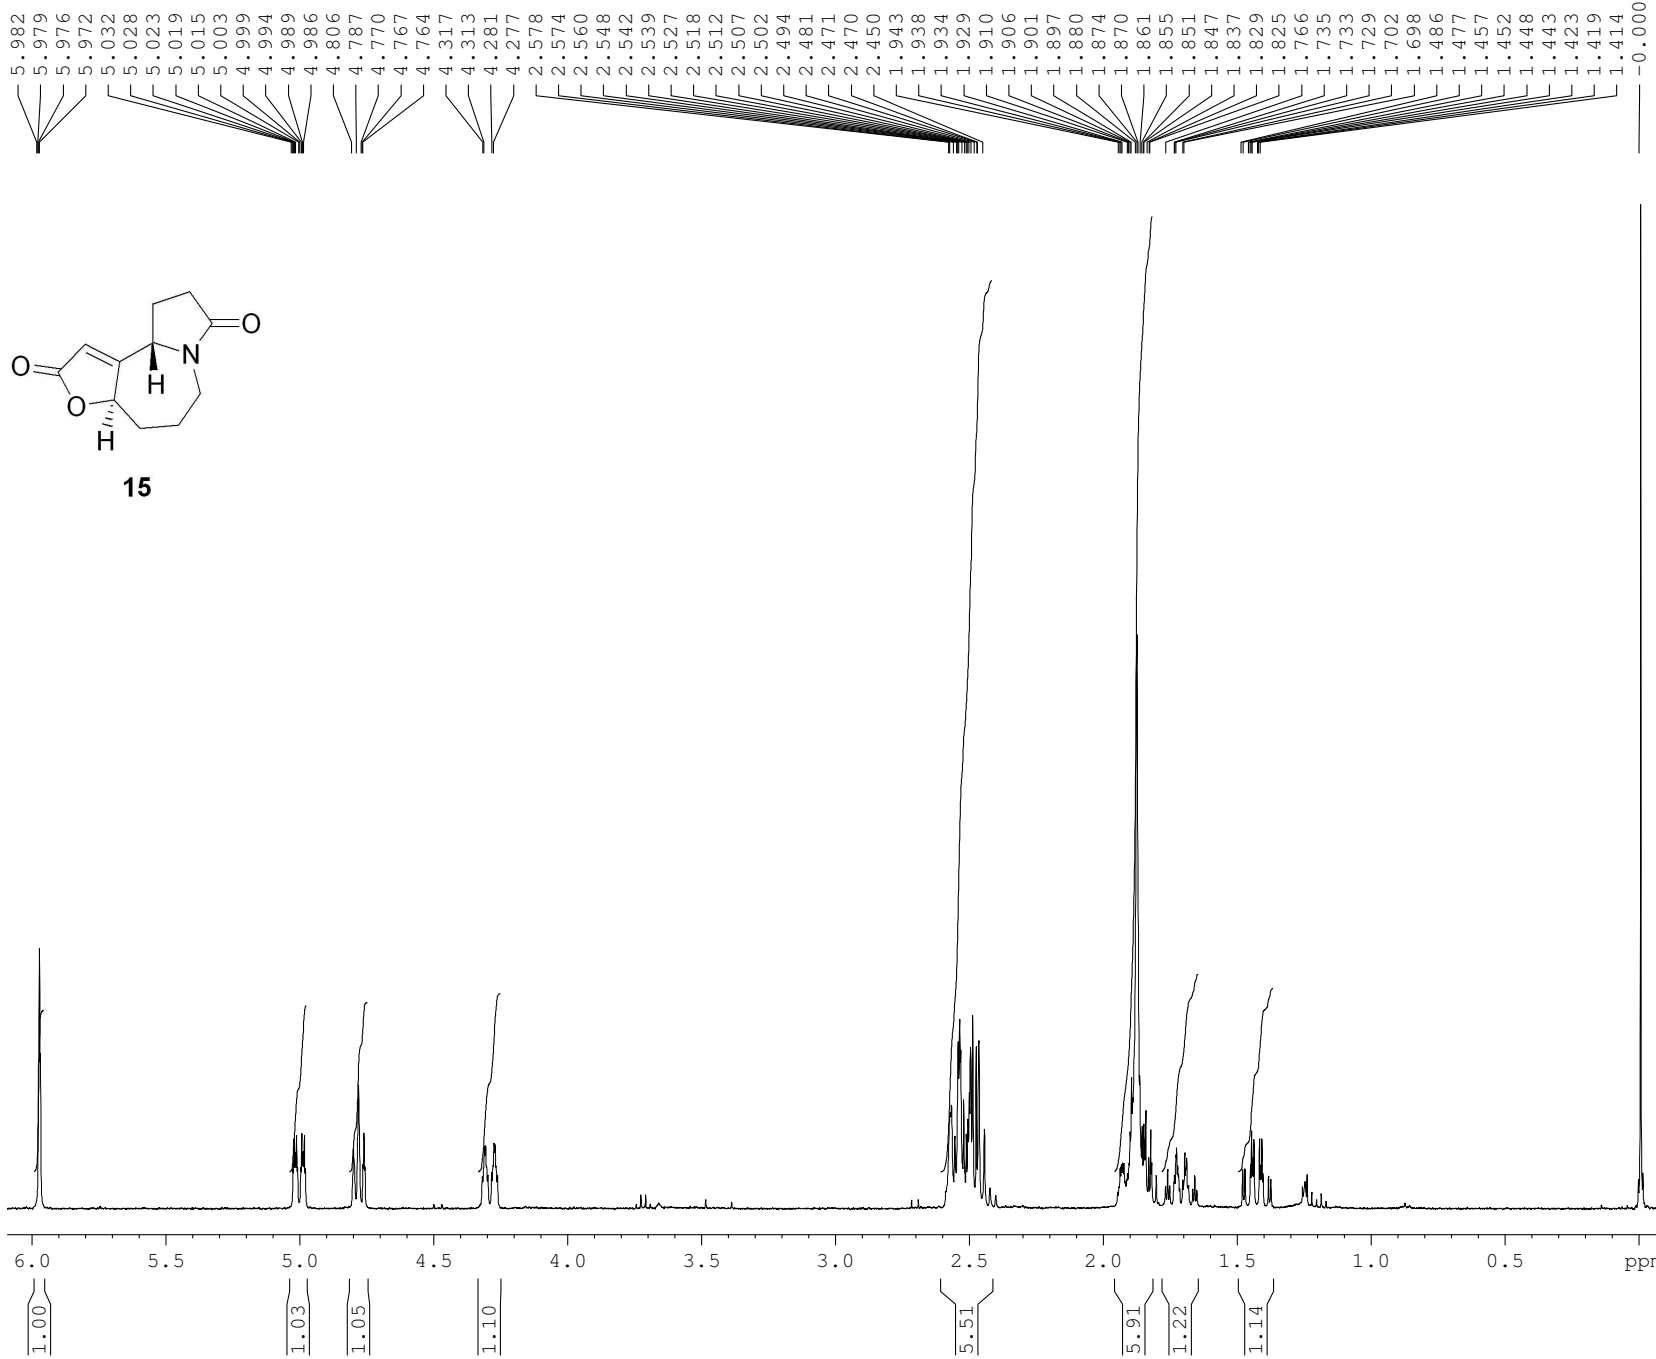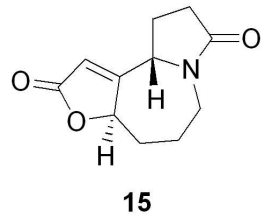

Current Data Parameters  
 NAME 100519 yellow2  
 EXPNO 1  
 PROCNO 1

F2 - Acquisition Parameters  
 Date\_ 20100519  
 Time 13.49  
 INSTRUM spect  
 PROBHD 5 mm PABBO BB-  
 PULPROG zg30  
 TD 65536  
 SOLVENT CDCl3  
 NS 4  
 DS 2  
 SWH 8223.685 Hz  
 FIDRES 0.125483 Hz  
 AQ 3.9846387 sec  
 RG 256  
 DW 60.800 usec  
 DE 6.00 usec  
 TE 293.6 K  
 D1 1.00000000 sec  
 TD0 1

==== CHANNEL f1 =====  
 NUC1 1H  
 P1 13.30 usec  
 PL1 -2.00 dB  
 PL1W 12.65980816 W  
 SFO1 400.1324710 MHz

F2 - Processing parameters  
 SI 32768  
 SF 400.1300098 MHz  
 WDW EM  
 SSB 0  
 LB 0.30 Hz  
 GB 0  
 PC 1.00

174.48  
174.13  
171.71

115.88

82.85

58.12

43.36

34.45

30.14

27.65

25.67

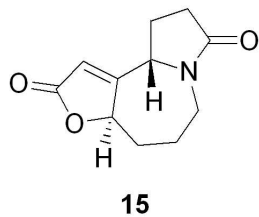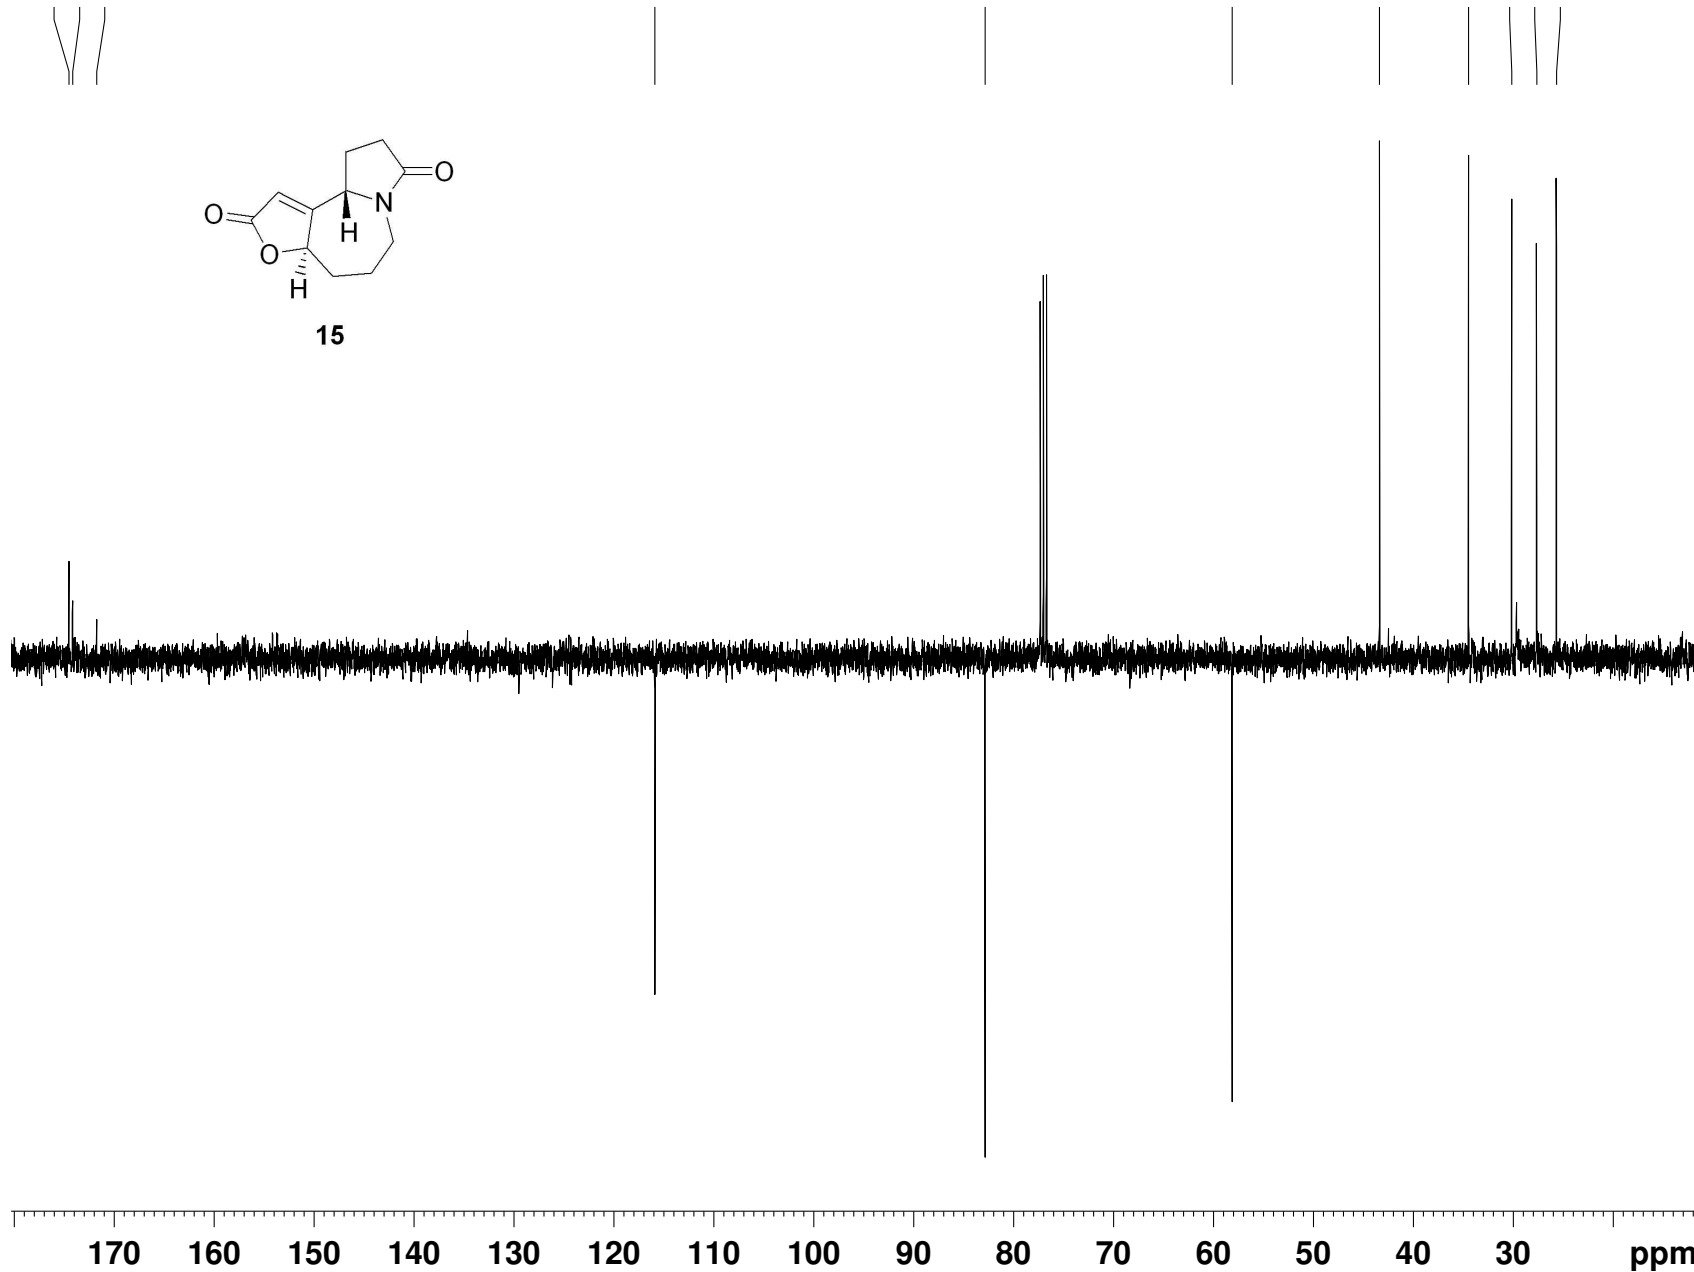

Current Data Parameters  
NAME 100519 carbon  
EXPNO 1  
PROCNO 1

F2 - Acquisition Parameters  
Date\_ 20100519  
Time 18.59  
INSTRUM spect  
PROBHD 5 mm PABBO BB-  
PULPROG jmod  
TD 65536  
SOLVENT CDC13  
NS 190  
DS 4  
SWH 24038.461 Hz  
FIDRES 0.366798 Hz  
AQ 1.3631988 sec  
RG 2050  
DW 20.800 usec  
DE 6.00 usec  
TE 295.0 K  
CNST2 145.0000000  
CNST11 1.0000000  
D1 2.00000000 sec  
D20 0.00689655 sec  
TD0 1

==== CHANNEL f1 =====  
NUC1 13C  
P1 8.60 usec  
P2 17.20 usec  
PL1 -2.00 dB  
PL1W 54.93878937 W  
SFO1 100.6228298 MHz

==== CHANNEL f2 =====  
CPDPRG2 waltz16  
NUC2 1H  
PCPD2 80.00 usec  
PL2 -0.50 dB  
PL12 14.10 dB  
PL2W 8.96245766 W  
PL12W 0.31076142 W  
SFO2 400.1316005 MHz

F2 - Processing parameters  
SI 32768  
SF 100.6127731 MHz  
WDW EM  
SSB 0  
LB 1.00 Hz  
GB 0  
PC 1.40

4.189  
4.120  
4.101  
4.066  
3.962  
3.672  
2.874  
2.749  
2.743  
2.696  
2.689  
2.671  
2.667  
2.656  
2.624  
2.612  
2.591  
2.530  
2.499  
2.429  
2.416  
2.404  
2.389  
2.379  
2.377  
2.348  
2.334  
2.325  
2.321  
2.312  
2.290  
2.283  
2.277  
2.202  
2.006  
1.915  
1.909  
1.898  
1.886  
1.879  
1.873  
1.797  
1.702  
1.699  
1.659  
1.627  
1.600  
1.593  
1.551  
1.542  
1.528  
1.472  
1.465  
1.321  
1.305  
1.293  
1.277  
1.266  
1.251  
1.233  
1.227  
1.216  
0.912  
0.894  
0.875  
0.869  
0.853  
0.119  
0.043  
-0.007  
-0.019  
-0.027  
-0.035

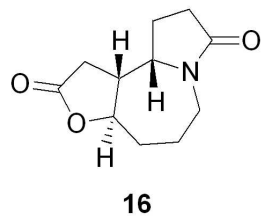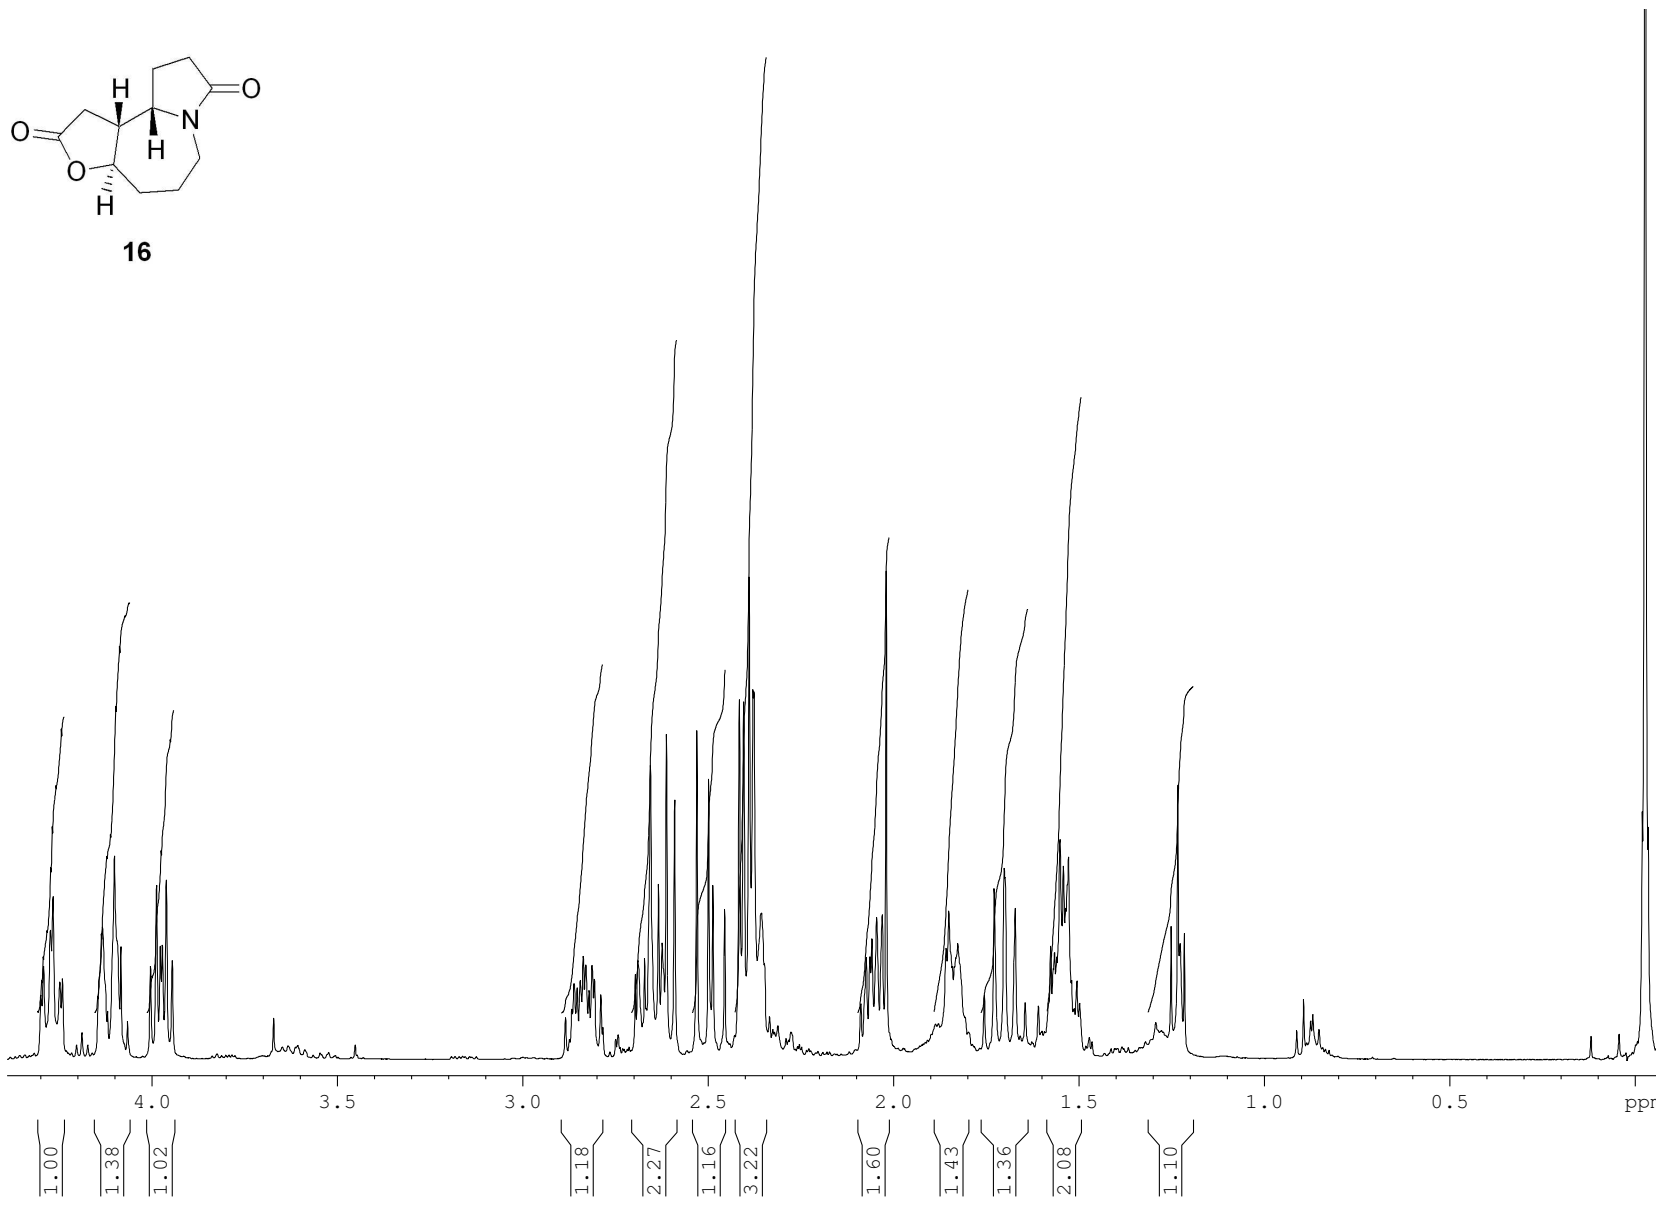

Current Data Parameters  
NAME 100316 yellow  
EXPNO 1  
PROCNO 1

F2 - Acquisition Parameters  
Date\_ 20100316  
Time 19.46  
INSTRUM spect  
PROBHD 5 mm PABBO BB-  
PULPROG zg30  
TD 65536  
SOLVENT CDCl3  
NS 16  
DS 2  
SWH 8223.685 Hz  
FIDRES 0.125483 Hz  
AQ 3.9846387 sec  
RG 101  
DW 60.800 usec  
DE 6.00 usec  
TE 293.6 K  
D1 1.00000000 sec  
TD0 1

===== CHANNEL f1 =====  
NUC1 1H  
P1 13.30 usec  
PL1 -2.00 dB  
PL1W 12.65980816 W  
SFO1 400.1324710 MHz

F2 - Processing parameters  
SI 32768  
SF 400.1300096 MHz  
WDW EM  
SSB 0  
LB 0.30 Hz  
GB 0  
PC 1.00

174.70  
174.03

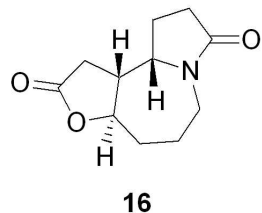

79.74  
55.98  
44.80  
40.11  
34.54  
30.93  
30.50  
25.40  
22.59

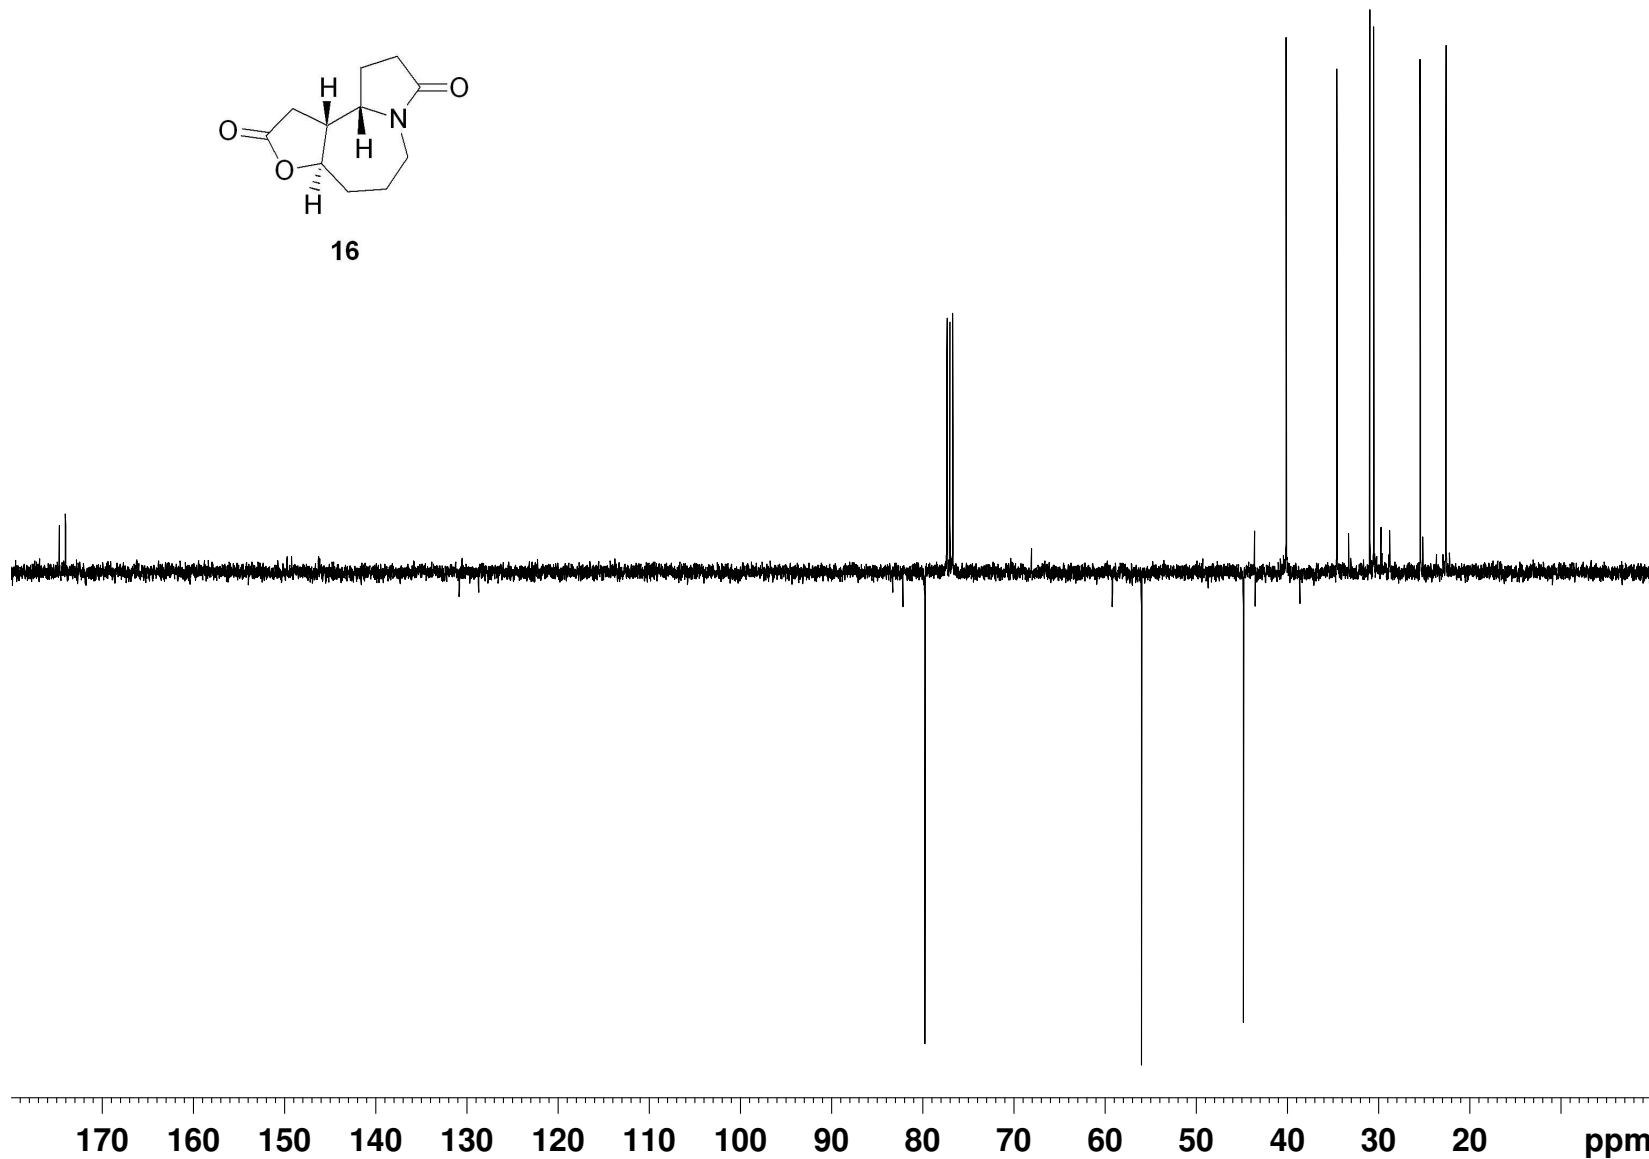

Current Data Parameters  
NAME 100317 carbon  
EXPNO 1  
PROCNO 1

F2 - Acquisition Parameters  
Date\_ 20100317  
Time 12.13  
INSTRUM spect  
PROBHD 5 mm PABBO BB-  
PULPROG jmod  
TD 65536  
SOLVENT CDCl3  
NS 276  
DS 4  
SWH 24038.461 Hz  
FIDRES 0.366798 Hz  
AQ 1.3631988 sec  
RG 2050  
DW 20.800 usec  
DE 6.00 usec  
TE 294.9 K  
CNST2 145.0000000  
CNST11 1.0000000  
D1 2.0000000 sec  
D20 0.00689655 sec  
TD0 1

===== CHANNEL f1 =====  
NUC1 13C  
P1 8.60 usec  
P2 17.20 usec  
PL1 -2.00 dB  
PL1W 54.93878937 W  
SFO1 100.6228298 MHz

===== CHANNEL f2 =====  
CPDPRG2 waltz16  
NUC2 1H  
PCPD2 80.00 usec  
PL2 -0.50 dB  
PL12 14.10 dB  
PL2W 8.96245766 W  
PL12W 0.31076142 W  
SFO2 400.1316005 MHz

F2 - Processing parameters  
SI 32768  
SF 100.6127766 MHz  
WDW EM  
SSB 0  
LB 1.00 Hz  
GB 0  
PC 1.40

4.231  
4.224  
4.206  
4.198  
4.179  
4.172  
4.165  
4.136  
4.130  
4.023  
4.007  
3.996  
3.991  
3.980  
3.964  
2.688  
2.673  
2.657  
2.652  
2.637  
2.620  
2.603  
2.589  
2.578  
2.572  
2.561  
2.555  
2.447  
2.440  
2.429  
2.423  
2.414  
2.404  
2.401  
2.392  
2.389  
2.386  
2.382  
2.375  
2.083  
2.069  
2.058  
2.053  
2.040  
2.026  
2.014  
1.894  
1.887  
1.883  
1.877  
1.870  
1.866  
1.862  
1.853  
1.846  
1.765  
1.738  
1.712  
1.682  
1.655  
1.563  
1.557  
1.548  
1.544  
1.537  
1.532  
1.527  
1.509  
1.502  
1.498  
1.494  
1.311  
1.294

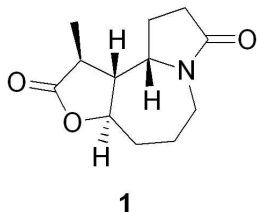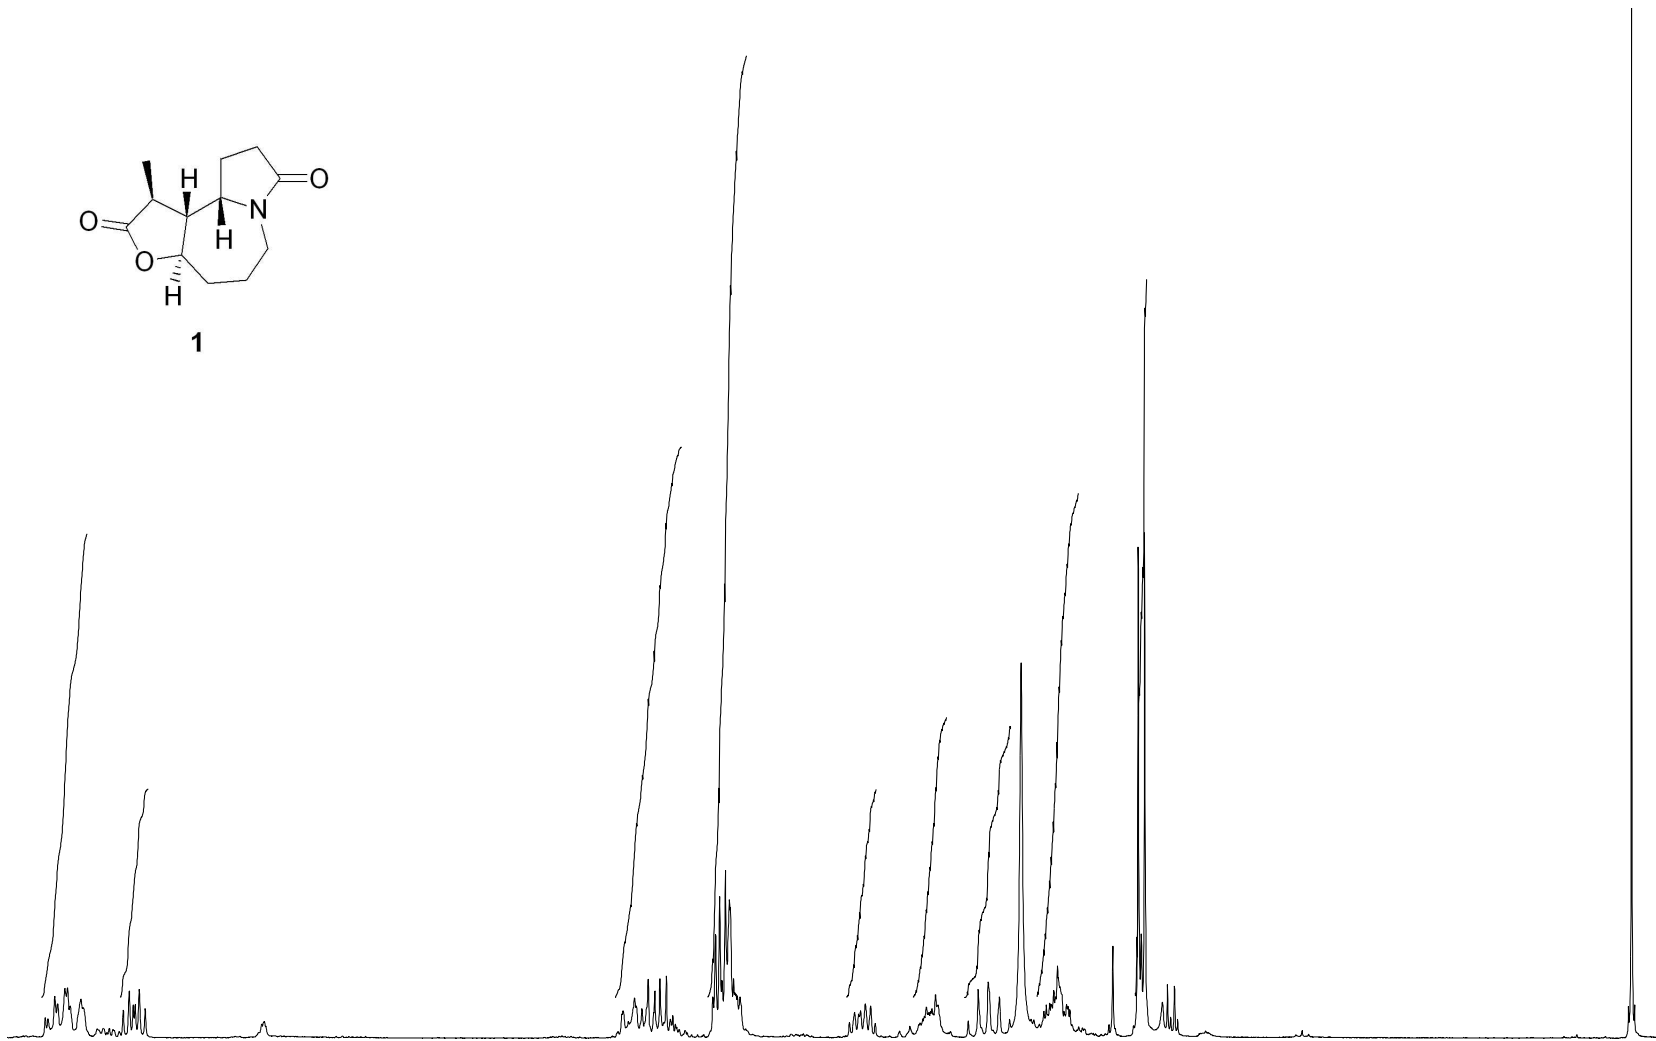

Current Data Parameters  
NAME 100903 yellow  
EXPNO 1  
PROCNO 1

F2 - Acquisition Parameters  
Date\_ 20100903  
Time 20.25  
INSTRUM spect  
PROBHD 5 mm PABBO BB-  
PULPROG zg30  
TD 65536  
SOLVENT CDC13  
NS 16  
DS 2  
SWH 8223.685 Hz  
FIDRES 0.125483 Hz  
AQ 3.9846387 sec  
RG 256  
DW 60.800 usec  
DE 6.00 usec  
TE 293.7 K  
D1 1.00000000 sec  
TD0 1

===== CHANNEL f1 =====  
NUC1 1H  
P1 13.30 usec  
PL1 -2.00 dB  
PL1W 12.65980816 W  
SFO1 400.1324710 MHz

F2 - Processing parameters  
SI 32768  
SF 400.1300098 MHz  
WDW EM  
SSB 0  
LB 0.30 Hz  
GB 0  
PC 1.00
